# Supplementary material for: The global and regional costs of healthy and sustainable dietary patterns: a modelling study
Source: PubMed Central journal article supplement (PMC8581186; doi:10.1016/s2542-5196(21)00251-5), 2021-10-27
Supplement: mmc1.pdf [file mmc1.pdf]

# THE LANCET Oncology

## Supplementary appendix 1

This appendix formed part of the original submission and has been peer reviewed.  
We post it as supplied by the authors.

Supplement to: Springmann M, Clark MA, Rayner M, Scarborough P, Webb P.  
The global and regional costs of healthy and sustainable dietary patterns: a modelling  
study. *Lancet Oncol* 2021; published online Oct 26. [http://dx.doi.org/10.1016/  
S2542-5196\(21\)00251-5](http://dx.doi.org/10.1016/S2542-5196(21)00251-5).

# The global and regional costs of healthy and sustainable dietary pattern: a modelling study

## Appendix

### Table of Contents

|             |                                                    |    |
|-------------|----------------------------------------------------|----|
| <b>SI.1</b> | <b>Price data</b> .....                            | 2  |
| <b>SI.2</b> | <b>Consumption data</b> .....                      | 17 |
| <b>SI.3</b> | <b>Diet scenarios</b> .....                        | 20 |
| <b>SI.4</b> | <b>Projections of food demand and prices</b> ..... | 24 |
| <b>SI.5</b> | <b>Health analysis and valuation</b> .....         | 27 |
| <b>SI.6</b> | <b>Climate-change analysis and valuation</b> ..... | 33 |
| <b>SI.7</b> | <b>Supplementary results</b> .....                 | 35 |
|             | <b>References</b> .....                            | 44 |

## **SI.1 Price data**

For our study, we used country-specific price data of food commodities collected as part of the International Comparison Program (ICP). The ICP is a worldwide statistical initiative led by the World Bank under the auspices of the United Nations Statistical Commission, with the main objective of providing comparable price and volume measures of gross domestic product (GDP) and its expenditure aggregates among countries within and across regions. Through a partnership with international, regional, sub-regional and national agencies, the ICP collects and compares price data and GDP expenditures to estimate and publish purchasing power parities (PPPs) of the world's economies. PPPs measure the total amount of goods and services that a single unit of a country's currency can buy in another country. PPPs can thus be used to convert the cost of a basket of goods and service into a common currency while eliminating price level differences across countries. The latest available data is for the year 2017.

Economies participating in ICP collect prices for a selection of the goods and services, including food products. Prices are reported as national annual average prices in local currency, i.e. they represent the average of prices collected at regular intervals throughout the year by household consumption surveys. Each region develops its own list of regional items for the regional comparison, which includes region-specific items representative of the consumption pattern in the region, as well as items from a global core list. The latter has been developed for the specific purpose of linking the regional results into a global set of results by including products that can be priced across most regions. Structured product descriptions are used to define the price-determining characteristics of the products.

For our analysis, we used a total of 20,666 estimates of annual average prices in 179 countries, covering 463 food items including 144 items from the global-core list and 319 items from the regional lists. We aggregated the detailed list of food items into a list of 31 food groups which we used to construct the diet scenarios. In line with the definition of the diet scenarios, we focused on those categories that are related to foods and can be expressed in primary commodity equivalents (i.e., as basic ingredients). SI Table 1 lists the regional coverage of the ICP data, and SI Table 2 lists the aggregation of food commodities into the food groups used for the analysis.

For the aggregation, we paired each item with its caloric content (to control for difference in processing and edible fractions), and converted the prices from local currency to USD. For the calorie conversion, we used data from the FoodData Central database maintained by the US Department of Agriculture to pair each food item with its caloric content. The price conversion was based on PPPs at the basic heading level which, for the food items used in the analysis, describes 24 groups of similar well-defined goods or services at the lowest level (i.e., most detailed) aggregation for which PPPs are calculated.

**SI Table 1.** Regional and country-level coverage of ICP data

| <b>Code</b> | <b>Name</b>            | <b>Regional Program</b>                |
|-------------|------------------------|----------------------------------------|
| ALB         | Albania                | Eurostat-OECD                          |
| DZA         | Algeria                | ICP Africa                             |
| AGO         | Angola                 | ICP Africa                             |
| AIA         | Anguilla               | ICP Latin America and the Caribbean    |
| ATG         | Antigua and Barbuda    | ICP Latin America and the Caribbean    |
| ARG         | Argentina              | ICP Latin America and the Caribbean    |
| ARM         | Armenia                | ICP Commonwealth of Independent States |
| ABW         | Aruba                  | ICP Latin America and the Caribbean    |
| AUS         | Australia              | Eurostat-OECD                          |
| AUT         | Austria                | Eurostat-OECD                          |
| AZE         | Azerbaijan             | ICP Commonwealth of Independent States |
| BHS         | Bahamas, The           | ICP Latin America and the Caribbean    |
| BHR         | Bahrain                | ICP Western Asia                       |
| BGD         | Bangladesh             | ICP Asia and the Pacific               |
| BRB         | Barbados               | ICP Latin America and the Caribbean    |
| BLR         | Belarus                | ICP Commonwealth of Independent States |
| BEL         | Belgium                | Eurostat-OECD                          |
| BLZ         | Belize                 | ICP Latin America and the Caribbean    |
| BEN         | Benin                  | ICP Africa                             |
| BMU         | Bermuda                | ICP Latin America and the Caribbean    |
| BTN         | Bhutan                 | ICP Asia and the Pacific               |
| BOL         | Bolivia                | ICP Latin America and the Caribbean    |
| BON         | Bonaire                | ICP Latin America and the Caribbean    |
| BIH         | Bosnia and Herzegovina | Eurostat-OECD                          |
| BWA         | Botswana               | ICP Africa                             |
| BRA         | Brazil                 | ICP Latin America and the Caribbean    |
| BRN         | Brunei Darussalam      | ICP Asia and the Pacific               |
| BGR         | Bulgaria               | Eurostat-OECD                          |
| BFA         | Burkina Faso           | ICP Africa                             |
| BDI         | Burundi                | ICP Africa                             |
| KHM         | Cambodia               | ICP Asia and the Pacific               |
| CMR         | Cameroon               | ICP Africa                             |
| CAN         | Canada                 | Eurostat-OECD                          |

|     |                          |                                                    |
|-----|--------------------------|----------------------------------------------------|
| CPV | Cabo Verde               | ICP Africa                                         |
| CYM | Cayman Islands           | ICP Latin America and the Caribbean                |
| CAF | Central African Republic | ICP Africa                                         |
| TCD | Chad                     | ICP Africa                                         |
| CHL | Chile                    | Eurostat-OECD                                      |
| CHN | China                    | ICP Asia and the Pacific                           |
| COL | Colombia                 | Eurostat-OECD                                      |
| COM | Comoros                  | ICP Africa                                         |
| COD | Congo, Dem. Rep.         | ICP Africa                                         |
| COG | Congo, Rep.              | ICP Africa                                         |
| CRI | Costa Rica               | Eurostat-OECD                                      |
| CIV | Côte d'Ivoire            | ICP Africa                                         |
| HRV | Croatia                  | Eurostat-OECD                                      |
| CUW | Curaçao                  | ICP Latin America and the Caribbean                |
| CYP | Cyprus                   | Eurostat-OECD                                      |
| CZE | Czech Republic           | Eurostat-OECD                                      |
| DNK | Denmark                  | Eurostat-OECD                                      |
| DJI | Djibouti                 | ICP Africa                                         |
| DMA | Dominica                 | ICP Latin America and the Caribbean                |
| DOM | Dominican Republic       | ICP Latin America and the Caribbean                |
| ECU | Ecuador                  | ICP Latin America and the Caribbean                |
| EGY | Egypt, Arab Rep. (AFR)   | ICP Africa & ICP Western Asia (dual participation) |
| EGZ | Egypt, Arab Rep. (WAS)   | ICP Africa & ICP Western Asia (dual participation) |
| SLV | El Salvador              | ICP Latin America and the Caribbean                |
| GNQ | Equatorial Guinea        | ICP Africa                                         |
| EST | Estonia                  | Eurostat-OECD                                      |
| SWZ | Eswatini                 | ICP Africa                                         |
| ETH | Ethiopia                 | ICP Africa                                         |
| FJI | Fiji                     | ICP Asia and the Pacific                           |
| FIN | Finland                  | Eurostat-OECD                                      |
| FRA | France                   | Eurostat-OECD                                      |
| GAB | Gabon                    | ICP Africa                                         |
| GMB | Gambia, The              | ICP Africa                                         |
| GEO | Georgia                  | ICP Special Participation                          |
| DEU | Germany                  | Eurostat-OECD                                      |
| GHA | Ghana                    | ICP Africa                                         |
| GRC | Greece                   | Eurostat-OECD                                      |
| GRD | Grenada                  | ICP Latin America and the Caribbean                |
| GIN | Guinea                   | ICP Africa                                         |
| GNB | Guinea-Bissau            | ICP Africa                                         |
| GUY | Guyana                   | ICP Latin America and the Caribbean                |
| HTI | Haiti                    | ICP Latin America and the Caribbean                |
| HND | Honduras                 | ICP Latin America and the Caribbean                |
| HKG | Hong Kong SAR, China     | ICP Asia and the Pacific                           |
| HUN | Hungary                  | Eurostat-OECD                                      |
| ISL | Iceland                  | Eurostat-OECD                                      |
| IND | India                    | ICP Asia and the Pacific                           |
| IDN | Indonesia                | ICP Asia and the Pacific                           |

|     |                    |                                                    |
|-----|--------------------|----------------------------------------------------|
| IRN | Iran, Islamic Rep. | ICP Special Participation                          |
| IRQ | Iraq               | ICP Western Asia                                   |
| IRL | Ireland            | Eurostat-OECD                                      |
| ISR | Israel             | Eurostat-OECD                                      |
| ITA | Italy              | Eurostat-OECD                                      |
| JAM | Jamaica            | ICP Latin America and the Caribbean                |
| JPN | Japan              | Eurostat-OECD                                      |
| JOR | Jordan             | ICP Western Asia                                   |
| KAZ | Kazakhstan         | ICP Commonwealth of Independent States             |
| KEN | Kenya              | ICP Africa                                         |
| KOR | Korea, Rep.        | Eurostat-OECD                                      |
| KWT | Kuwait             | ICP Western Asia                                   |
| KGZ | Kyrgyz Republic    | ICP Commonwealth of Independent States             |
| LAO | Lao PDR            | ICP Asia and the Pacific                           |
| LVA | Latvia             | Eurostat-OECD                                      |
| LSO | Lesotho            | ICP Africa                                         |
| LBR | Liberia            | ICP Africa                                         |
| LTU | Lithuania          | Eurostat-OECD                                      |
| LUX | Luxembourg         | Eurostat-OECD                                      |
| MDG | Madagascar         | ICP Africa                                         |
| MWI | Malawi             | ICP Africa                                         |
| MYS | Malaysia           | ICP Asia and the Pacific                           |
| MDV | Maldives           | ICP Asia and the Pacific                           |
| MLI | Mali               | ICP Africa                                         |
| MLT | Malta              | Eurostat-OECD                                      |
| MRT | Mauritania         | ICP Africa                                         |
| MUS | Mauritius          | ICP Africa                                         |
| MEX | Mexico             | Eurostat-OECD                                      |
| MDA | Moldova            | ICP Commonwealth of Independent States             |
| MNG | Mongolia           | ICP Asia and the Pacific                           |
| MNE | Montenegro         | Eurostat-OECD                                      |
| MSR | Montserrat         | ICP Latin America and the Caribbean                |
| MAR | Morocco (AFR)      | ICP Africa & ICP Western Asia (dual participation) |
| MAS | Morocco (WAS)      | ICP Africa & ICP Western Asia (dual participation) |
| MOZ | Mozambique         | ICP Africa                                         |
| MMR | Myanmar            | ICP Asia and the Pacific                           |
| NAM | Namibia            | ICP Africa                                         |
| NPL | Nepal              | ICP Asia and the Pacific                           |
| NLD | Netherlands        | Eurostat-OECD                                      |
| NZL | New Zealand        | Eurostat-OECD                                      |
| NIC | Nicaragua          | ICP Latin America and the Caribbean                |
| NER | Niger              | ICP Africa                                         |
| NGA | Nigeria            | ICP Africa                                         |
| MKD | North Macedonia    | Eurostat-OECD                                      |
| NOR | Norway             | Eurostat-OECD                                      |
| OMN | Oman               | ICP Western Asia                                   |
| PAK | Pakistan           | ICP Asia and the Pacific                           |
| PAN | Panama             | ICP Latin America and the Caribbean                |

|     |                                |                                                                             |
|-----|--------------------------------|-----------------------------------------------------------------------------|
| PRY | Paraguay                       | ICP Latin America and the Caribbean                                         |
| PER | Peru                           | ICP Latin America and the Caribbean                                         |
| PHL | Philippines                    | ICP Asia and the Pacific                                                    |
| POL | Poland                         | Eurostat-OECD                                                               |
| PRT | Portugal                       | Eurostat-OECD                                                               |
| QAT | Qatar                          | ICP Western Asia                                                            |
| ROU | Romania                        | Eurostat-OECD                                                               |
| RUS | Russian Federation             | Eurostat-OECD & ICP Commonwealth of Independent States (dual participation) |
| RWA | Rwanda                         | ICP Africa                                                                  |
| STP | São Tomé and Príncipe          | ICP Africa                                                                  |
| SAU | Saudi Arabia                   | ICP Western Asia                                                            |
| SEN | Senegal                        | ICP Africa                                                                  |
| SRB | Serbia                         | Eurostat-OECD                                                               |
| SYC | Seychelles                     | ICP Africa                                                                  |
| SLE | Sierra Leone                   | ICP Africa                                                                  |
| SGP | Singapore                      | ICP Asia and the Pacific                                                    |
| SXM | Sint Maarten (Dutch part)      | ICP Latin America and the Caribbean                                         |
| SVK | Slovak Republic                | Eurostat-OECD                                                               |
| SVN | Slovenia                       | Eurostat-OECD                                                               |
| ZAF | South Africa                   | ICP Africa                                                                  |
| ESP | Spain                          | Eurostat-OECD                                                               |
| LKA | Sri Lanka                      | ICP Asia and the Pacific                                                    |
| KNA | St. Kitts and Nevis            | ICP Latin America and the Caribbean                                         |
| LCA | St. Lucia                      | ICP Latin America and the Caribbean                                         |
| VCT | St. Vincent and the Grenadines | ICP Latin America and the Caribbean                                         |
| SDN | Sudan (AFR)                    | ICP Africa & ICP Western Asia (dual participation)                          |
| SDO | Sudan (WAS)                    | ICP Africa & ICP Western Asia (dual participation)                          |
| SUR | Suriname                       | ICP Latin America and the Caribbean                                         |
| SWE | Sweden                         | Eurostat-OECD                                                               |
| CHE | Switzerland                    | Eurostat-OECD                                                               |
| TWN | Taiwan, China                  | ICP Asia and the Pacific                                                    |
| TJK | Tajikistan                     | ICP Commonwealth of Independent States                                      |
| TZA | Tanzania                       | ICP Africa                                                                  |
| THA | Thailand                       | ICP Asia and the Pacific                                                    |
| TGO | Togo                           | ICP Africa                                                                  |
| TTO | Trinidad and Tobago            | ICP Latin America and the Caribbean                                         |
| TUN | Tunisia                        | ICP Africa                                                                  |
| TUR | Turkey                         | Eurostat-OECD                                                               |
| TCA | Turks and Caicos Islands       | ICP Latin America and the Caribbean                                         |
| UGA | Uganda                         | ICP Africa                                                                  |
| UKR | Ukraine                        | ICP Special Participation                                                   |
| ARE | United Arab Emirates           | ICP Western Asia                                                            |
| GBR | United Kingdom                 | Eurostat-OECD                                                               |
| USA | United States                  | Eurostat-OECD                                                               |
| URY | Uruguay                        | ICP Latin America and the Caribbean                                         |
| VNM | Vietnam                        | ICP Asia and the Pacific                                                    |
| VGB | British Virgin Islands         | ICP Latin America and the Caribbean                                         |

|     |                    |                  |
|-----|--------------------|------------------|
| PSE | West Bank and Gaza | ICP Western Asia |
| ZMB | Zambia             | ICP Africa       |
| ZWE | Zimbabwe           | ICP Africa       |

**SI Table 2.** Aggregation from food items to the food groups used in the analysis from the ICP global-core list (GLB) and the regional lists of ICP regional program's in the Commonwealth of Independent States (CIS), Africa (AFR), Western Asia (WAS), Asia and the Pacific (ASI), and Latin America and the Caribbean (LAC).

| Item name                                        | Food group | Coverage |
|--------------------------------------------------|------------|----------|
| Long-grain rice, parboiled, WKB                  | rice       | GLB      |
| Long-grain rice, not parboiled, WKB              | rice       | GLB      |
| Long grain rice, family pack, WKB                | rice       | GLB      |
| Jasmine rice, WKB                                | rice       | GLB      |
| Basmati rice, WKB                                | rice       | GLB      |
| Broken rice, 25%, BNR                            | rice       | GLB      |
| Medium-grain rice, BNR                           | rice       | GLB      |
| Brown rice, family pack, BL                      | rice       | GLB      |
| Short-grain rice, BNR                            | rice       | GLB      |
| Sticky rice, WKB                                 | rice       | GLB      |
| Long-grain rice, not parboiled, BL               | rice       | CIS      |
| Long-grain rice, parboiled, in cooking bags, WKB | rice       | CIS      |
| Round-grain Rice, WKB                            | rice       | CIS      |
| Risotto Rice, WKB                                | rice       | CIS      |
| Long-grained rice-25 to 50 KG,BNR                | rice       | AFR      |
| Egyptian rice                                    | rice       | WAS      |
| Sun White Rice - Australia                       | rice       | WAS      |
| Uncle Ben's rice                                 | rice       | WAS      |
| Brown rice, loose                                | rice       | ASI      |
| White rice #1, BNR                               | rice       | ASI      |
| White rice #3, BNR                               | rice       | ASI      |
| White rice #5, BNR                               | rice       | ASI      |
| White rice #7, Prepacked, BL                     | rice       | ASI      |
| White rice #8, Prepacked, BL                     | rice       | ASI      |
| White rice #9, Prepacked, BL                     | rice       | ASI      |
| White rice #10, Prepacked, BL                    | rice       | ASI      |
| Premium rice #1, Prepacked, BL                   | rice       | ASI      |
| Premium rice #2, Prepacked, BL                   | rice       | ASI      |
| Premium rice #3, BNR                             | rice       | ASI      |
| Premium rice #4, BNR                             | rice       | ASI      |
| Rice flour, Atta, WKB                            | rice       | ASI      |
| Wheat flour, not self-rising, BL                 | wheat      | GLB      |
| Wheat semolina (suji), WKB                       | wheat      | GLB      |
| Baguette, BNR                                    | wheat      | GLB      |
| Bread, white, loaf, BNR                          | wheat      | GLB      |



|                                            |             |     |
|--------------------------------------------|-------------|-----|
| Bread, whole wheat, loaf, BNR              | wheat       | GLB |
| Roll, BNR                                  | wheat       | GLB |
| Bread, white, sliced, WKB                  | wheat       | GLB |
| Pita bread, BNR                            | wheat       | GLB |
| Short pasta, BL                            | wheat       | GLB |
| Spaghetti, WKB                             | wheat       | GLB |
| Dried noodles, WKB                         | wheat       | GLB |
| Instant noodles, any flavor, WKB           | wheat       | GLB |
| Vermicelli, BL                             | wheat       | GLB |
| Short pasta, WKB                           | wheat       | GLB |
| Couscous, BNR                              | wheat       | GLB |
| Spaghetti, BARILLA                         | wheat       | GLB |
| Wheat flour, WKB                           | wheat       | CIS |
| Roll, multicorn                            | wheat       | CIS |
| Bread, white, Large Loaf                   | wheat       | CIS |
| Bread, white, industrially packed, WKB     | wheat       | CIS |
| Bread, white, toast, Large pack, WKB       | wheat       | CIS |
| Bread, mixed                               | wheat       | CIS |
| Bread, multicorn                           | wheat       | CIS |
| Bread, multicorn, industrially packed, WKB | wheat       | CIS |
| National bread (johnny-cake) (CIS)         | wheat       | CIS |
| Spaghetti, BL                              | wheat       | CIS |
| Pasta, with eggs, WKB                      | wheat       | CIS |
| Bread unpacked                             | wheat       | LAC |
| Round bread                                | wheat       | AFR |
| Sliced brown bread (AFR)                   | wheat       | AFR |
| Sweet Bread                                | wheat       | AFR |
| Sliced brown bread (WAS)                   | wheat       | WAS |
| Burger Bread                               | wheat       | WAS |
| Samoon Bread                               | wheat       | WAS |
| Lebanese Bread                             | wheat       | WAS |
| Brown Flour                                | wheat       | WAS |
| Wheat flour, loose, BNR                    | wheat       | ASI |
| Wholemeal flour, Atta, BL                  | wheat       | ASI |
| Bread, white, unsliced, WKB                | wheat       | ASI |
| Roll or bun, Prepacked, BNR                | wheat       | ASI |
| Lasagne (sheets)                           | wheat       | AFR |
| Egg noodles, WKB                           | wheat       | ASI |
| Fresh rice noodles, BL                     | wheat       | ASI |
| Corn (maize) flour, white, WKB             | maize       | GLB |
| Maize Flour, Yellow                        | maize       | AFR |
| Maize Flour White (Maizena)                | maize       | AFR |
| Maize grains, White                        | maize       | AFR |
| Corn                                       | maize       | WAS |
| STARCH                                     | maize       | WAS |
| Corn (maize) flour, loose, BL              | maize       | ASI |
| Maize, BL                                  | maize       | ASI |
| Oats, rolled, WKB                          | othr_grains | GLB |

|                                          |             |     |
|------------------------------------------|-------------|-----|
| Buckwheat (CIS)                          | othr_grains | CIS |
| Millet (CIS)                             | othr_grains | CIS |
| Hard Loose Bulgur                        | othr_grains | WAS |
| Millet, Sorghum, BL                      | othr_grains | ASI |
| Oats, Quaker                             | othr_grains | ASI |
| Beef, centerBrisket, withBones (B2)      | beef        | CIS |
| Beef, Silverside (F2a)                   | beef        | CIS |
| Beef, Sirloin steak (H1)                 | beef        | CIS |
| Veal, schnitzel/escalope (A5)            | beef        | CIS |
| Veal, loin (B2)                          | beef        | CIS |
| Beef, fillet, tenderloin                 | beef        | GLB |
| Beef, rump steak                         | beef        | GLB |
| Beef, center brisket                     | beef        | GLB |
| Beef, cubes for stew or curry            | beef        | GLB |
| Beef, with bones                         | beef        | GLB |
| Beef, minced                             | beef        | GLB |
| Veal chops                               | beef        | GLB |
| Veal breast, with bones                  | beef        | GLB |
| Beef without bones                       | beef        | AFR |
| Burger                                   | beef        | WAS |
| Round steak                              | beef        | ASI |
| Sirloin steak                            | beef        | ASI |
| Buffalo, without bones, non-specific cut | beef        | ASI |
| Beef, without bones, non-specific cut    | beef        | ASI |
| Veal, with bones                         | beef        | ASI |
| Beef, fillet, frozen, tenderloin         | beef        | ASI |
| Pork, schnitzel/escalope (A)             | pork        | CIS |
| Pork, belly (C)                          | pork        | CIS |
| Pork, collar (B1)                        | pork        | CIS |
| Pork, joint piece for roasting (B2)      | pork        | CIS |
| Pork, loin chop                          | pork        | GLB |
| Pork, fillet                             | pork        | GLB |
| Pork, shoulder                           | pork        | GLB |
| Pork, ribs                               | pork        | GLB |
| Pork thigh, with bones                   | pork        | ASI |
| Pork loin, without bones                 | pork        | ASI |
| Pork, without bones, non-specific cut    | pork        | ASI |
| Pork, with bones, non-specific cut       | pork        | ASI |
| Lamb, hindLeg (hindquarters A)           | lamb        | CIS |
| Lamb, whole leg                          | lamb        | GLB |
| Lamb, chops                              | lamb        | GLB |
| Mutton, mixed cut                        | lamb        | GLB |
| Goat, mixed cut, with bones              | lamb        | GLB |
| Mutton chop                              | lamb        | AFR |
| Live Sheep                               | lamb        | AFR |
| Live Goat                                | lamb        | AFR |
| Goat leg                                 | lamb        | ASI |
| Mutton chops                             | lamb        | ASI |

|                                                          |             |     |
|----------------------------------------------------------|-------------|-----|
| Chicken, for roasting, free range                        | poultry     | CIS |
| Turkey breast, fillet                                    | poultry     | CIS |
| Chicken, whole, fresh                                    | poultry     | GLB |
| Chicken, whole, frozen                                   | poultry     | GLB |
| Chicken breast, without skin and bones                   | poultry     | GLB |
| Chicken legs                                             | poultry     | GLB |
| Chicken, live                                            | poultry     | GLB |
| Chicken breast, with skin and bones                      | poultry     | GLB |
| Chicken, Traditionally bred, live                        | poultry     | AFR |
| Chicken wings (WAS)                                      | poultry     | WAS |
| Chicken burger                                           | poultry     | WAS |
| Native house chicken, fresh                              | poultry     | ASI |
| Whole duck, fresh                                        | poultry     | ASI |
| Chicken wings (ASI)                                      | poultry     | ASI |
| Chicken, non-specific cuts, fresh                        | poultry     | ASI |
| Chicken, non-specific cuts, frozen                       | poultry     | ASI |
| Sausage, Frankfurter/Wiener type, artificial skin, WKB   | pork        | CIS |
| Sausage, fresh and raw, sold loose                       | pork        | CIS |
| Cooked pork sausage, country typical variety, sold loose | pork        | CIS |
| Ham, air dried, sold loose                               | pork        | CIS |
| Ham, from the thigh, cooked and smoked, sold loose       | pork        | CIS |
| Ham, turkey, WKB                                         | pork        | CIS |
| Salami, sold loose                                       | pork        | CIS |
| Salami, WKB                                              | pork        | CIS |
| Grilled/roasted chicken                                  | poultry     | CIS |
| Chicken nuggets/dippers, frozen, WKB                     | poultry     | CIS |
| Pork ham, pressed, WKB                                   | pork        | GLB |
| Bacon, smoked, WKB                                       | pork        | GLB |
| Beef liver, BNR                                          | beef        | GLB |
| Corned beef, WKB                                         | beef        | GLB |
| Canned chicken                                           | poultry     | AFR |
| Sausages, Whole/Frankfurter                              | pork        | CAR |
| Mutton Tripes                                            | lamb        | AFR |
| Sausage                                                  | pork        | AFR |
| Beef Merguez (spiced)                                    | beef        | AFR |
| Beef ham                                                 | beef        | AFR |
| Lamb Liver                                               | lamb        | WAS |
| Luncheon Chicken                                         | poultry     | WAS |
| Luncheon Meat                                            | pork        | WAS |
| BEEF SAUSAGE                                             | beef        | WAS |
| Camel Meat                                               | lamb        | WAS |
| Turkey                                                   | poultry     | WAS |
| Pork liver, BNR                                          | pork        | ASI |
| Mutton/goat liver, BNR                                   | lamb        | ASI |
| Breakfast sausage, chicken, BNR                          | poultry     | ASI |
| Sliced ham, pork, WKB                                    | pork        | ASI |
| Canned beef, chunks, WKB                                 | beef        | ASI |
| Rainbow-Trout (Salmo gairdneri)                          | fish_freshw | CIS |

|                                                                 |             |     |
|-----------------------------------------------------------------|-------------|-----|
| Cod (Gadus morhua), frozen, WKB                                 | fish_demrs  | CIS |
| Hake (Merluccius merluccius), Alaska Pollock (Theragra chalcogr | fish_demrs  | CIS |
| Pangasius catfish (Pangasius hypophthalmus), fillet, frozen, BL | fish_freshw | CIS |
| Calamari rings, frozen, WKB                                     | shellfish   | CIS |
| Carp                                                            | fish_freshw | GLB |
| Mackerel, un-cleaned                                            | fish_pelag  | GLB |
| Sea bass                                                        | fish_other  | GLB |
| Tuna steaks                                                     | fish_pelag  | GLB |
| Shrimps, whole, fresh                                           | shellfish   | GLB |
| Shrimps, peeled, frozen                                         | shellfish   | GLB |
| Squid                                                           | shellfish   | GLB |
| Cod (gadus morhua)                                              | fish_demrs  | GLB |
| Red snapper                                                     | fish_other  | GLB |
| Sea crab                                                        | shellfish   | GLB |
| Tilapia                                                         | fish_freshw | GLB |
| Black pomfret                                                   | fish_pelag  | GLB |
| Mullet                                                          | fish_demrs  | GLB |
| Fresh Small Sardines                                            | fish_pelag  | AFR |
| Tuna fish fresh                                                 | fish_pelag  | WAS |
| Grouper (Hamour) fish                                           | fish_other  | WAS |
| Capitaine                                                       | fish_other  | AFR |
| Red Snapper (AFR)                                               | fish_other  | AFR |
| Giant Shrimp                                                    | shellfish   | WAS |
| Safi                                                            | fish_other  | WAS |
| Lobster                                                         | shellfish   | WAS |
| Catfish                                                         | fish_freshw | ASI |
| Spanish Mackerel                                                | fish_pelag  | ASI |
| Sole                                                            | fish_other  | ASI |
| Tuna steak                                                      | fish_pelag  | ASI |
| White pomfret                                                   | fish_other  | ASI |
| Mud crab                                                        | shellfish   | ASI |
| Sea lobster                                                     | shellfish   | ASI |
| Prawn/Shrimp, small                                             | shellfish   | ASI |
| Prawn/Shrimp, medium                                            | shellfish   | ASI |
| Squid, small                                                    | shellfish   | ASI |
| Small fresh fish                                                | fish_pelag  | ASI |
| Tuna                                                            | fish_pelag  | ASI |
| Smoked mackerel (Scomber scombrus), fillet, WKB                 | fish_pelag  | CIS |
| Tinned sardines, in olive oil, with skin and bones, WKB         | fish_other  | CIS |
| Tinned pink tuna (Skipjack, Thunnus Thynn, Albacares = yellow f | fish_pelag  | CIS |
| Tinned tuna flakes, in vegetable oil, BL                        | fish_pelag  | CIS |
| Breaded fish fillet (Pollock), 2 - 4 pieces, frozen, WKB        | fish_demrs  | CIS |
| Breaded fish fillet (Cod), 2 - 5 pieces, frozen, WKB            | fish_demrs  | CIS |
| Fish fingers, from fillet, WKB                                  | fish_demrs  | CIS |
| Fish fingers, BL                                                | fish_demrs  | CIS |
| Salty herring (CIS)                                             | fish_pelag  | CIS |
| Salmon in natural juice, WKB (CIS)                              | fish_freshw | CIS |
| Canned sprats in oil, WKB (CIS)                                 | fish_pelag  | CIS |

|                                                                 |             |     |
|-----------------------------------------------------------------|-------------|-----|
| Sardines, tinned, with skin, in vegetable oil, WKB              | fish_pelag  | GLB |
| Tuna flakes, tinned, WKB                                        | fish_pelag  | GLB |
| Mackerel fillet, tinned, in vegetable oil, WKB                  | fish_pelag  | GLB |
| Mackerel fillet, tinned, in tomato sauce, WKB                   | fish_pelag  | CAR |
| Cold-smoked salmon, WKB                                         | fish_pelag  | GLB |
| Dried shrimps, BNR                                              | shellfish   | GLB |
| Dried sardines, BNR                                             | fish_pelag  | AFR |
| Dried small fish, BNR                                           | fish_pelag  | AFR |
| Dried Machoirion, BNR                                           | fish_freshw | AFR |
| Smoked shrimps/prawns, BNR                                      | shellfish   | AFR |
| Tuna in vegetable oil, exclude Tuna Steaks, WKB                 | fish_pelag  | AFR |
| Sardines in tomato sauce, WKB                                   | fish_pelag  | AFR |
| Mackerel in vegetable oil, WKB                                  | fish_pelag  | AFR |
| Fissikh                                                         | fish_demrs  | WAS |
| Salted and semi-dried fish, BL                                  | fish_pelag  | ASI |
| Fishball, BNR                                                   | fish_pelag  | ASI |
| Milk, fresh, unskimmed, BNR (CIS)                               | milk        | CIS |
| Milk, UHT, semi-skimmed, WKB                                    | milk        | CIS |
| Milk, UHT, semi-skimmed, BL                                     | milk        | CIS |
| Fresh cream (CIS)                                               | cream       | CIS |
| Milk, fresh, unskimmed, WKB                                     | milk        | GLB |
| Milk, UHT, unskimmed, WKB                                       | milk        | GLB |
| Milk, fresh, low-fat, WKB                                       | milk        | GLB |
| Buffalo milk, not pasteurized, BL                               | milk        | ASI |
| Sour cream / crème épaisse / smetana, WKB                       | cream       | CIS |
| Cream for whipping, WKB                                         | cream       | CIS |
| Milk, powdered, WKB                                             | milk        | GLB |
| Sour cream, WKB                                                 | cream       | GLB |
| Powdered milk, WKB                                              | milk        | ASI |
| Cheese, processed, spreadable, industrially packed, WKB         | cheese      | CIS |
| Cheese, blue, industrially packed, WKB                          | cheese      | CIS |
| Cheese, Edam or Gouda type, young, industrially packed, BL      | cheese      | CIS |
| Cheese, Emmental type, industrially packed, WKB                 | cheese      | CIS |
| Brynza (White cheese) (CIS)                                     | cheese      | CIS |
| Cheese, Feta type, industrially packed, WKB                     | cheese      | CIS |
| Cheese, Gouda type, industrially packed, WKB                    | cheese      | CIS |
| Cheese, Mozzarella, industrially packed, WKB                    | cheese      | CIS |
| Cheese, Parmesan type, dehydrated & grated, industrially packed | cheese      | CIS |
| Cheese, cheddar, WKB                                            | cheese      | GLB |
| Cream cheese, WKB                                               | cheese      | GLB |
| Cheese, processed, WKB                                          | cheese      | GLB |
| Cheese, camembert type, WKB                                     | cheese      | GLB |
| Cheese, gouda type, WKB                                         | cheese      | GLB |
| Tofu, WKB                                                       | legumes     | GLB |
| Fresh cheese emmental, BL                                       | cheese      | AFR |
| Fresh cheese edam, BL                                           | cheese      | AFR |
| white cheese                                                    | cheese      | WAS |
| Labneh                                                          | cheese      | WAS |

|                                                |               |     |
|------------------------------------------------|---------------|-----|
| Cheese spread, WKB                             | cheese        | ASI |
| Local cheese, WKB                              | cheese        | ASI |
| Chicken eggs, free range                       | eggs          | CIS |
| Chicken eggs, caged hen, large size            | eggs          | GLB |
| Chicken eggs, caged hen, medium size           | eggs          | GLB |
| Eggs, traditional production                   | eggs          | AFR |
| Chicken egg, caged hen, large size             | eggs          | ASI |
| Chicken eggs, caged hen, large size, loose     | eggs          | ASI |
| Salted duck egg                                | eggs          | ASI |
| Butter, unsalted, BL                           | butter        | CIS |
| Butter, unsalted, WKB                          | butter        | GLB |
| Butter, salted, WKB                            | butter        | GLB |
| Ghee / clarified butter, WKB                   | butter        | GLB |
| Butter, sold loose                             | butter        | AFR |
| Ghee                                           | butter        | WAS |
| Ghee, cow/buffalo, WKB                         | butter        | ASI |
| Olive oil, extra virgin, BL                    | oil_veg       | CIS |
| Sunflower oil, WKB                             | oil_veg       | CIS |
| Cottonseed oil (CIS)                           | oil_veg       | CIS |
| Sunflower oil, BL                              | oil_veg       | GLB |
| Olive oil, extra virgin, WKB                   | oil_veg       | GLB |
| Palm oil, WKB                                  | oil_palm      | GLB |
| Soybean oil, WKB                               | oil_veg       | GLB |
| Peanut oil, WKB                                | oil_veg       | GLB |
| Vegetable oil, WKB                             | oil_veg       | GLB |
| Corn oil, WKB                                  | oil_veg       | GLB |
| Palm oil unrefined, BL                         | oil_palm      | AFR |
| Tahina                                         | treenuts      | WAS |
| Corn Oil                                       | oil_veg       | WAS |
| Peanut butter, WKB                             | groundnuts    | ASI |
| Olive oil, standard, WKB                       | oil_veg       | ASI |
| Coconut oil, BL                                | oil_veg       | ASI |
| Fresh apples, Golden Delicious or Granny Smith | fruits_temp   | CIS |
| Fresh mandarines                               | fruits_trop   | CIS |
| Fresh pears (CIS)                              | fruits_temp   | CIS |
| Fresh kiwis                                    | fruits_temp   | CIS |
| Fresh strawberries (CIS)                       | fruits_temp   | CIS |
| Fresh apple, red delicious                     | fruits_temp   | GLB |
| Fresh bananas, standard                        | fruits_starch | GLB |
| Fresh grapes, white                            | fruits_temp   | GLB |
| Fresh grapefruit                               | fruits_trop   | GLB |
| Fresh oranges                                  | fruits_trop   | GLB |
| Fresh papaya                                   | fruits_trop   | GLB |
| Fresh pineapples                               | fruits_trop   | GLB |
| Fresh lemons                                   | fruits_trop   | GLB |
| Fresh mangoes                                  | fruits_trop   | GLB |
| Fresh watermelon                               | fruits_trop   | GLB |
| Plantains, Fresh Ripe                          | fruits_starch | CAR |

|                                           |               |     |
|-------------------------------------------|---------------|-----|
| Fresh apples, typical local variety       | fruits_temp   | GLB |
| Plantains, Fresh Green                    | fruits_starch | CAR |
| Fresh peaches                             | fruits_temp   | GLB |
| Bananas, Fresh Green                      | fruits_starch | CAR |
| Fresh melon                               | fruits_trop   | GLB |
| Large Mango (Grafted)                     | fruits_trop   | AFR |
| Banana, short finger length               | fruits_starch | AFR |
| Coconut                                   | fruits_trop   | AFR |
| Fresh Plum (Al-Barkouk)                   | fruits_temp   | WAS |
| Fresh Pears (WAS)                         | fruits_temp   | WAS |
| Fresh Clementine (Yussufi Orange)         | fruits_trop   | WAS |
| Fresh Cherries                            | fruits_temp   | WAS |
| Fresh Apricots                            | fruits_temp   | WAS |
| Fresh Strawberries (WAS)                  | fruits_temp   | WAS |
| Fresh Dates                               | fruits_temp   | WAS |
| Fresh Pomegranate                         | fruits_trop   | WAS |
| Fresh Figs                                | fruits_trop   | WAS |
| Fresh Guava                               | fruits_trop   | WAS |
| Lime                                      | fruits_trop   | ASI |
| Grapes, violet, with seed                 | fruits_trop   | ASI |
| Coconut, young green                      | fruits_trop   | ASI |
| Tamarind                                  | fruits_trop   | ASI |
| Frozen strawberries, WKB                  | fruits_temp   | CIS |
| Frozen raspberries, WKB                   | fruits_temp   | CIS |
| Frozen berries, mixed, BL                 | fruits_temp   | CIS |
| Dried almonds, peeled, WKB                | treenuts      | CIS |
| Dried walnuts, WKB                        | treenuts      | CIS |
| Raisins, WKB                              | fruits_temp   | CIS |
| Raisins, BL                               | fruits_temp   | CIS |
| Dried apricots (CIS)                      | fruits_temp   | CIS |
| Tinned peaches, in syrup, WKB             | fruits_temp   | CIS |
| Tinned pears, in syrup, WKB               | fruits_temp   | CIS |
| Fruit cocktail, in syrup, WKB             | fruits_trop   | CIS |
| Walnuts, inshell (CIS)                    | treenuts      | CIS |
| Tinned pineapple, whole slices, BL        | fruits_trop   | GLB |
| Dried almonds, BL                         | treenuts      | GLB |
| Roasted groundnuts (peanuts), WKB         | groundnuts    | GLB |
| Mixed fruits, in syrup, WKB               | fruits_temp   | GLB |
| Dried dates, WKB                          | fruits_temp   | GLB |
| Natural Groundnuts, BL                    | groundnuts    | AFR |
| Walnuts                                   | treenuts      | WAS |
| Cashewnuts                                | treenuts      | WAS |
| Raisin                                    | fruits_temp   | WAS |
| Tamarind, preserved, BL                   | fruits_trop   | ASI |
| Fresh broccoli                            | vegetables    | CIS |
| Fresh cabbage lettuce, round, soft leaves | vegetables    | CIS |
| Fresh courgettes                          | vegetables    | CIS |
| Fresh cultivated mushrooms, white, whole  | vegetables    | CIS |

|                                         |            |     |
|-----------------------------------------|------------|-----|
| Fresh leek                              | vegetables | CIS |
| Fresh tomato cluster                    | vegetables | CIS |
| Fresh cucumber                          | vegetables | GLB |
| Fresh green pepper                      | vegetables | GLB |
| Fresh carrots                           | vegetables | GLB |
| Fresh onions                            | vegetables | GLB |
| Fresh maize (corn) ears                 | vegetables | GLB |
| Fresh tomatoes, round                   | vegetables | GLB |
| Fresh cabbage, green                    | vegetables | GLB |
| Fresh iceberg lettuce                   | vegetables | GLB |
| Fresh avocado                           | vegetables | GLB |
| Fresh eggplants (aubergines)            | vegetables | GLB |
| Fresh cauliflower                       | vegetables | GLB |
| Fresh spinach                           | vegetables | GLB |
| Fresh chilies, long                     | vegetables | GLB |
| Pumpkin (CAR)                           | vegetables | CAR |
| Ginger, mature                          | vegetables | GLB |
| Garlic, white                           | vegetables | GLB |
| Green Beans                             | legumes    | AFR |
| Spotted beans                           | legumes    | AFR |
| Peas (AFR)                              | legumes    | AFR |
| Green beans (Pulses)                    | legumes    | WAS |
| Okra                                    | vegetables | WAS |
| Peas (WAS)                              | legumes    | WAS |
| Dhal, Khesari, BL                       | legumes    | ASI |
| Dhal, Musur, BL                         | legumes    | ASI |
| Dhal, Split Peas, BL                    | legumes    | ASI |
| Round red raddish                       | vegetables | WAS |
| Zucchini                                | vegetables | WAS |
| Mloukhia                                | vegetables | WAS |
| Lettuce                                 | vegetables | WAS |
| Mint leaves                             | vegetables | WAS |
| Spinach Chinese                         | vegetables | ASI |
| Water spinach                           | vegetables | ASI |
| Pumpkin (ASI)                           | vegetables | ASI |
| Radish, white                           | vegetables | ASI |
| Fresh potatoes, industrially packed     | roots      | CIS |
| Fresh potatoes, brown                   | roots      | GLB |
| Fresh sweet potatoes                    | roots      | GLB |
| Fresh cassava / manioc / yuca           | roots      | GLB |
| Fresh potatoes, white                   | roots      | ASI |
| Fresh taro                              | roots      | ASI |
| Frozen green beans, fine, WKB           | legumes    | CIS |
| Frozen mixed vegetables, natural, WKB   | vegetables | CIS |
| Frozen mixed vegetables, natural, BL    | vegetables | CIS |
| Frozen peas, small/fine, WKB            | legumes    | CIS |
| Frozen spinach, natural, WKB            | vegetables | CIS |
| Tomato puree (Passata di Pomodoro), WKB | vegetables | CIS |



|                                            |            |     |
|--------------------------------------------|------------|-----|
| Chopped tomatoes, WKB                      | vegetables | CIS |
| Chopped tomatoes, BL                       | vegetables | CIS |
| Mushrooms, slices in salt water, BL        | vegetables | CIS |
| Green olives, without stones, WKB          | vegetables | CIS |
| Pickled gherkins, WKB                      | vegetables | CIS |
| Dried peas, WKB (CIS)                      | legumes    | CIS |
| White beans, dried, BL                     | legumes    | GLB |
| White beans in tomato sauce, tinned, HEINZ | legumes    | GLB |
| Green olives, with stones, WKB             | vegetables | GLB |
| Potato chips, WKB                          | roots      | GLB |
| French fries, frozen, WKB                  | roots      | GLB |
| Tomato paste, WKB                          | vegetables | GLB |
| Green peas, tinned, WKB                    | legumes    | GLB |
| Sweet corn (maize), tinned, BL             | vegetables | GLB |
| Canned black beans                         | legumes    | LAC |
| Lentils, dried, WKB                        | legumes    | GLB |
| Red Kidney beans, dried                    | legumes    | CAR |
| Button mushrooms, tinned, WKB              | vegetables | GLB |
| Tomato paste (Large), WKB                  | vegetables | AFR |
| Peppers, paste, WKB                        | vegetables | AFR |
| Chillies, BL                               | vegetables | AFR |
| Hommus                                     | legumes    | WAS |
| Dried Broad Beans                          | legumes    | WAS |
| Foul Medammas, canned                      | legumes    | WAS |
| Mixed Pickles                              | vegetables | WAS |
| Green/mung beans, dried, BL                | legumes    | ASI |
| Moong dahl, loose, BL                      | legumes    | ASI |
| Peanuts in shell, BL                       | groundnuts | ASI |
| Chillies, dried, BL                        | spices     | ASI |
| Mushrooms, dried, BL                       | vegetables | ASI |
| White sugar, BL                            | sugar      | CIS |
| Icing sugar, WKB                           | sugar      | CIS |
| Sugar lumps, WKB                           | sugar      | CIS |
| Sweetener, tablets, WKB                    | sugar      | CIS |
| White sugar, WKB                           | sugar      | GLB |
| Brown sugar, WKB                           | sugar      | GLB |
| Sweetener, Well-Known Brand                | sugar      | LAC |
| White sugar, Sold Loose, BL                | sugar      | AFR |
| Brown sugar cubes-prepacked, WKB           | sugar      | AFR |
| Glucose, Powdered, WKB                     | sugar      | AFR |
| White sugar, loose, BNR                    | sugar      | ASI |
| Honey, mixed blossoms, WKB                 | honey      | CIS |
| Honey, mixed blossoms, BL                  | honey      | GLB |
| Honey, mixed blossoms, WKB (ASI)           | honey      | ASI |

---

## SI.2 Consumption data

We estimated baseline food consumption for the year 2017 by adopting estimates of food availability from the FAO's commodity balances and food balance sheets, and adjusting those for the amount of food wasted at the point of consumption.<sup>1,2</sup> Commodity balances and food balance sheets report on the amount of food that is available for human consumption.<sup>2</sup> They reflect the quantities reaching the consumer, but do not include waste from both edible and inedible parts of the food commodity occurring in the household. As such, the amount of food actually consumed may be lower than the quantity shown in the food balance sheet depending on the degree of losses of edible food in the household, e.g. during storage, in preparation and cooking, as plate-waste, or quantities fed to domestic animals and pets, or thrown away.

We followed the waste-accounting methodology developed by the FAO to account for the amount of food wasted at the household level that was not accounted for in food availability estimates.<sup>1</sup> For each commodity and region, we estimated food consumption by multiplying food availability data with conversion factors (*cf*) that represent the amount of edible food (e.g. after peeling) and with the percentage of food wasted during consumption ( $1-wp(cns)$ ). For roots and tubers, fruits and vegetables, and fish and seafood, we also accounted for the differences in wastage between the proportion that is utilised fresh ( $pct_{frsh}$ ) and the proportion that utilised in processed form ( $pct_{prcd}$ ). The equation used for each food commodity and region was:

$$\begin{aligned} Consumption = & Availability \cdot \frac{pct_{frsh}}{100} \cdot cf_{frsh} \cdot \left(1 - \frac{wp(cns_{frsh})}{100}\right) \\ & + Availability \cdot \frac{pct_{prcd}}{100} \cdot cf_{prcd} \cdot \left(1 - \frac{wp(cns_{prcd})}{100}\right) \end{aligned}$$

SI Table 3 provides an overview of the parameters used in the calculation, and SI Table 4 provides an overview of the baseline consumption data calculated in that way. The differences across energy intake reflect differences in the prevalence of overweight and obesity across regions.<sup>3</sup>

**SI Table 3.** Percentage of food wasted during consumption ( $wp_{cns}$ ), and percentage of processed utilisation ( $pct_{prcd}$ ). The percentage of fresh utilisation is calculated as  $1-pct_{prcd}$ . Conversion factors to edible portions of foods are provided below the table.

| Food group            | Item             | Region                                                       |                      |                     |                    |                                     |                          |               |
|-----------------------|------------------|--------------------------------------------------------------|----------------------|---------------------|--------------------|-------------------------------------|--------------------------|---------------|
|                       |                  | Europe                                                       | USA, Canada, Oceania | Industrialized Asia | Sub-Saharan Africa | North Africa, West and Central Asia | South and Southeast Asia | Latin America |
| cereals               | $wp(cns)$        | 25                                                           | 27                   | 20                  | 1                  | 12                                  | 3                        | 10            |
|                       | $pct_{prcd}$     | 73                                                           | 73                   | 15                  | 50                 | 19                                  | 10                       | 80            |
| roots and tuber       | $wp(cns)$        | 17                                                           | 30                   | 10                  | 2                  | 6                                   | 3                        | 4             |
|                       | $wp(cns_{prcd})$ | 12                                                           | 12                   | 12                  | 1                  | 3                                   | 5                        | 2             |
| oilseeds and pulses   | $cns$            | 4                                                            | 4                    | 4                   | 1                  | 2                                   | 1                        | 2             |
|                       | $pct_{prcd}$     | 60                                                           | 60                   | 4                   | 1                  | 50                                  | 5                        | 50            |
| fruits and vegetables | $wp(cns)$        | 19                                                           | 28                   | 15                  | 5                  | 12                                  | 7                        | 10            |
|                       | $wp(cns_{prcd})$ | 15                                                           | 10                   | 8                   | 1                  | 1                                   | 1                        | 1             |
| milk and dairy        | $wp(cns)$        | 7                                                            | 15                   | 5                   | 0.1                | 2                                   | 1                        | 4             |
| eggs                  | $wp(cns)$        | 8                                                            | 15                   | 5                   | 1                  | 12                                  | 2                        | 4             |
| meat                  | $wp(cns)$        | 11                                                           | 11                   | 8                   | 2                  | 8                                   | 4                        | 6             |
|                       | $pct_{prcd}$     | <i>40% for low-income countries, and 96% for all others.</i> |                      |                     |                    |                                     |                          |               |
| fish and seafood      | $wp(cns)$        | 11                                                           | 33                   | 8                   | 2                  | 4                                   | 2                        | 4             |
|                       | $wp(cns_{prcd})$ | 10                                                           | 10                   | 7                   | 1                  | 2                                   | 1                        | 2             |

*Conversion factors*: maize, millet, sorghum: 0.69; wheat, rye, other grains: 0.78; rice: 1; roots: 0.74 (0.9 for industrial processing); nuts and seeds: 0.79; oils: 1; vegetables: 0.8 (0.75 for industrial processing); fruits: 0.8 (0.75 for industrial processing); beef: 0.715; lamb: 0.71; pork: 0.68; poultry: 0.71; other meat: 0.7; milk and dairy: 1; fish and seafood: 0.5; other crops: 0.78

**SI Table 4.** Overview of baseline consumption data by region and food group (in grams per day for each food group, and in kcal per day for total energy intake).

| Food group         | Global | High-income countries | Upper middle-income countries | Lower middle-income countries | Low-income countries |
|--------------------|--------|-----------------------|-------------------------------|-------------------------------|----------------------|
| wheat              | 116    | 140                   | 127                           | 108                           | 48                   |
| rice               | 206    | 53                    | 195                           | 292                           | 122                  |
| maize              | 33     | 15                    | 31                            | 36                            | 81                   |
| other grains       | 19     | 10                    | 7                             | 21                            | 91                   |
| roots              | 129    | 106                   | 122                           | 123                           | 267                  |
| fruits (temperate) | 75     | 74                    | 106                           | 55                            | 30                   |
| fruits (tropical)  | 44     | 48                    | 57                            | 36                            | 18                   |
| fruits (starchy)   | 32     | 20                    | 24                            | 38                            | 64                   |
| vegetables         | 272    | 195                   | 472                           | 150                           | 88                   |
| legumes            | 24     | 13                    | 17                            | 32                            | 50                   |
| treenuts           | 6      | 8                     | 6                             | 5                             | 4                    |
| groundnuts         | 5      | 5                     | 7                             | 3                             | 10                   |
| vegetable oil      | 22     | 44                    | 23                            | 14                            | 11                   |
| palm oil           | 6      | 3                     | 6                             | 7                             | 8                    |
| sugar              | 48     | 80                    | 46                            | 41                            | 23                   |
| eggs               | 26     | 33                    | 46                            | 9                             | 2                    |
| milk               | 152    | 169                   | 130                           | 178                           | 73                   |
| cream              | 2      | 6                     | 1                             | 0                             | 0                    |
| cheese             | 7      | 33                    | 3                             | 1                             | 1                    |
| butter             | 2      | 7                     | 1                             | 0                             | 0                    |
| shellfish          | 7      | 11                    | 12                            | 2                             | 0                    |
| fish (freshwater)  | 11     | 5                     | 15                            | 11                            | 5                    |
| fish (pelagic)     | 4      | 7                     | 3                             | 4                             | 1                    |
| fish (demersal)    | 4      | 9                     | 4                             | 2                             | 1                    |
| fish (other)       | 2      | 1                     | 2                             | 1                             | 2                    |
| beef               | 18     | 39                    | 21                            | 8                             | 11                   |
| lamb               | 5      | 5                     | 7                             | 3                             | 6                    |
| pork               | 28     | 61                    | 38                            | 10                            | 5                    |
| poultry            | 29     | 55                    | 48                            | 6                             | 3                    |
| other crops        | 70     | 147                   | 81                            | 27                            | 67                   |
| total kcal         | 2,187  | 2,222                 | 2,281                         | 2,128                         | 1,939                |

### SI.3 Diet scenarios

For the analysis of healthy and sustainable dietary patterns, we adopted energy-balanced varieties of the flexitarian, pescatarian, vegetarian, and vegan dietary patterns defined by the EAT-Lancet Commission on Healthy Diets from Sustainable Food Systems.<sup>4</sup>

As previously estimated<sup>5</sup> and used by the EAT-Lancet Commission,<sup>4</sup> the average calorie needs differ by region based on its age composition, and range around 2100 kcal/d. For the calculations, which need estimates of healthy body weights (or body mass index, BMI), physical activity levels, and heights as inputs, it was assumed that BMIs are in line with WHO recommendations,<sup>6</sup> and moderately physical activity levels are maintained as recommended. In addition, the US characteristics for height were used,<sup>7</sup> which can be seen as an upper bound that does not penalise future growth of populations. According to the estimates, calorie needs reach a maximum of 2500 kcal/d for ages 20-24 (averaged between men and women), but are reduced to 2000 kcal for ages 65 and older. SI Table 5 provides an overview.

**SI Table 5.** Calorie needs (kcal/d) by age and sex.

| Age   | Female | Male | Average |
|-------|--------|------|---------|
| 0-4   | 1200   | 1200 | 1200    |
| 5-9   | 1520   | 1600 | 1560    |
| 10-14 | 1920   | 2120 | 2020    |
| 15-19 | 2040   | 2760 | 2400    |
| 20-24 | 2200   | 2800 | 2500    |
| 25-29 | 2000   | 2600 | 2300    |
| 30-34 | 2000   | 2600 | 2300    |
| 35-39 | 2000   | 2600 | 2300    |
| 40-44 | 2000   | 2600 | 2300    |
| 45-49 | 2000   | 2400 | 2200    |
| 50-54 | 1800   | 2400 | 2100    |
| 55-59 | 1800   | 2400 | 2100    |
| 60-64 | 1800   | 2400 | 2000    |
| 65-69 | 1800   | 2200 | 2000    |
| 70-74 | 1800   | 2200 | 2000    |
| 75-79 | 1800   | 2200 | 2000    |
| 80-84 | 1800   | 2200 | 2000    |
| 85-89 | 1800   | 2200 | 2000    |
| 90-94 | 1800   | 2200 | 2000    |
| 95-99 | 1800   | 2200 | 2000    |
| 100+  | 1800   | 2200 | 2000    |

The flexitarian diets (FLX) included at least 500 g/d of fruits and vegetables of different colours and groups (the composition of which is determined by regional preferences), at least 100 g/d of plant-based protein sources (legumes, soybeans, nuts), a focus on whole grains, modest amounts of animal-based proteins, such as poultry, fish, milk, and eggs, and limited amounts of red meat (1 portion per week), refined sugar (<5% of total energy), vegetable oils that are high in saturated fat (in particular palm oil), and starchy foods which have a relatively high glycaemic index. SI Table 6 provides an overview of the food-based recommendations used for constructing the flexitarian-diet scenario.

**SI Table 6.** Food-based dietary recommendations for healthy, more plant-based (flexitarian) diets. The recommendations include recommended minimum (min) and maximum (max) intake expressed by weight or calories, and servings. Fish and seafood can be substituted by plant-based foods (legumes, soybeans, nuts and seeds, fruits and vegetables) in vegetarian diets.

| Food item         | minimum level |         | maximum level                 |                     |
|-------------------|---------------|---------|-------------------------------|---------------------|
|                   | g/d           | serving | g/d                           | serving             |
| wheat             |               |         |                               |                     |
| rice              |               |         | 860 kcal/d for energy balance | 3-4 (1/3 of energy) |
| maize             |               |         |                               |                     |
| other grains      |               |         |                               |                     |
| roots             |               |         |                               |                     |
| legumes           | 50            | 1/2     |                               |                     |
| soybeans          | 25            | 1/4     |                               |                     |
| nuts & seeds      | 50            | 2       |                               |                     |
| vegetables        | 300           | 3-4     |                               |                     |
| fruits            | 200           | 2-3     |                               |                     |
| sugar             |               |         | 31                            | 5% of energy        |
| palm oil          |               |         | 6.8                           | 1                   |
| vegetable oil     |               |         | 80                            | 1/3 of energy       |
| beef              |               |         |                               |                     |
| lamb              |               |         | 14                            | 1/7                 |
| pork              |               |         |                               |                     |
| poultry           |               |         | 29                            | 1/2                 |
| eggs              |               |         | 13                            | 1/5                 |
| milk              |               |         | 250                           | 1                   |
| shellfish         |               |         |                               |                     |
| fish (freshwater) | 28            | 1/2     |                               |                     |
| fish (demersal)   |               |         |                               |                     |
| fish (pelagic)    |               |         |                               |                     |

Based on the flexitarian diets, we constructed more specialised diets, including pescatarian, vegetarian and vegan diets, which are in line with dietary guidelines and observed dietary patterns in specialised cohorts.<sup>8,9</sup> For the pescatarian diets, meat-based protein sources in the flexitarian diets were replaced (on a kcal basis) to three quarters by fish and seafood, and one quarter by either fruits and vegetables (PSC<sub>veg</sub>) or whole grains (PSC<sub>gm</sub>); for the vegetarian diets, they were replaced to three quarters by plant-based proteins, and one quarter by either fruits and vegetables (VEG<sub>veg</sub>) or whole grains (VEG<sub>gm</sub>); and for the vegan diets, all animal-based protein sources were replaced to three quarters by plant proteins, and one quarter by either fruits and vegetables (VGN<sub>veg</sub>) or whole grains (VGN<sub>gm</sub>). We aimed to preserve the regional character of dietary patterns by maintaining the regional composition of specific foods within broader categories, such as preferences for specific staple crops (wheat, maize, rice, etc) and fruits (temperate, tropical). SI Table 7 provides an overview of the composition of the different diet scenarios.

**SI Table 7.** Overview of food consumption (g/d for food groups, kcal/d for total) by diet scenarios (net of waste). The diet scenarios include benchmark diets (BMK), flexitarian diets (FLX) and two variants each of pescatarian (PSC), vegetarian (VEG), and vegan (VGN) diets. Each variant is based on the flexitarian diets by replacing animal products with a mix of fish (pescatarian) or legumes (vegetarian, vegan) and either fruits and vegetables (veg) or whole grains (grn).

| Food groups        | BMK          | FLX          | PSC <sup>veg</sup> | PSC <sup>grn</sup> | VGN <sup>veg</sup> | VEG <sup>veg</sup> | VEG <sup>grn</sup> | VGN <sup>grn</sup> |
|--------------------|--------------|--------------|--------------------|--------------------|--------------------|--------------------|--------------------|--------------------|
| wheat              | 116          | 73           | 73                 | 75                 | 73                 | 76                 | 73                 | 82                 |
| rice               | 206          | 133          | 133                | 136                | 133                | 138                | 133                | 143                |
| maize              | 33           | 21           | 21                 | 22                 | 21                 | 22                 | 21                 | 23                 |
| other grains       | 19           | 12           | 12                 | 13                 | 12                 | 13                 | 12                 | 14                 |
| roots              | 129          | 81           | 81                 | 81                 | 81                 | 81                 | 81                 | 81                 |
| fruits (temperate) | 75           | 117          | 106                | 145                | 106                | 121                | 106                | 106                |
| fruits (tropical)  | 44           | 60           | 67                 | 60                 | 70                 | 60                 | 84                 | 60                 |
| fruits (starchy)   | 32           | 40           | 40                 | 40                 | 40                 | 40                 | 40                 | 40                 |
| vegetables         | 272          | 388          | 423                | 388                | 438                | 388                | 505                | 388                |
| legumes            | 24           | 75           | 75                 | 75                 | 90                 | 90                 | 111                | 111                |
| treenuts           | 6            | 29           | 29                 | 29                 | 29                 | 29                 | 29                 | 29                 |
| groundnuts         | 5            | 21           | 21                 | 21                 | 21                 | 21                 | 21                 | 21                 |
| vegetable oil      | 22           | 42           | 42                 | 42                 | 42                 | 42                 | 42                 | 42                 |
| palm oil           | 6            | 4            | 4                  | 4                  | 4                  | 4                  | 4                  | 4                  |
| sugar              | 48           | 31           | 31                 | 31                 | 31                 | 31                 | 31                 | 31                 |
| eggs               | 26           | 11           | 11                 | 11                 | 11                 | 11                 |                    |                    |
| milk               | 152          | 128          | 128                | 128                | 128                | 128                |                    |                    |
| cream              | 2            | 1            | 1                  | 1                  | 1                  | 1                  |                    |                    |
| cheese             | 7            | 6            | 6                  | 6                  | 6                  | 6                  |                    |                    |
| butter             | 2            | 1            | 1                  | 1                  | 1                  | 1                  |                    |                    |
| shellfish          | 7            | 7            | 21                 | 21                 |                    |                    |                    |                    |
| fish (freshwater)  | 11           | 17           | 38                 | 38                 |                    |                    |                    |                    |
| fish (pelagic)     | 4            | 6            | 14                 | 14                 |                    |                    |                    |                    |
| fish (demersal)    | 4            | 5            | 13                 | 13                 |                    |                    |                    |                    |
| fish (other)       | 2            | 2            | 5                  | 5                  |                    |                    |                    |                    |
| beef               | 18           | 5            |                    |                    |                    |                    |                    |                    |
| lamb               | 5            | 2            |                    |                    |                    |                    |                    |                    |
| pork               | 29           | 5            |                    |                    |                    |                    |                    |                    |
| poultry            | 28           | 18           |                    |                    |                    |                    |                    |                    |
| other crops        | 70           |              |                    |                    |                    |                    |                    |                    |
| <b>total kcal</b>  | <b>2,187</b> | <b>2,091</b> | <b>2,091</b>       | <b>2,091</b>       | <b>2,091</b>       | <b>2,091</b>       | <b>2,091</b>       | <b>2,091</b>       |



#### **SI.4 Projections of food demand and prices**

We used projections of food prices and demand from the International Model for Policy Analysis of Agricultural Commodities and Trade (IMPACT). IMPACT uses economic, water, and crop models to simulate global food production, consumption, and trade of 62 agricultural commodities for over 158 world regions.<sup>10</sup> The IMPACT model system is organized around a core global partial equilibrium multi-market model of agricultural production, demand, trade, and prices. The multi-market model simulates the operation of national and global markets for agricultural commodities, solving for equilibrium prices and quantities. The model specifies supply and demand behaviour in all markets.

For our analysis, we adopted IMPACT's estimates of food demand and consumer prices for different socio-economic pathways that differed in their assumptions on income and population growth, and applied the percentage changes compared to the year 2017 to our baseline price and consumption estimates. The socio-economic scenarios included a “middle-of-the-road” socioeconomic trajectory (SSP2), a “Sustainability”-termed socio-economic pathway (SSP1) which is characterized by medium to high economic growth and low population growth, and a “Fragmentation”-termed socio-economic pathway (SSP3) which is characterized by slow economic growth and high population growth.<sup>11</sup> The scenarios have been specified with GDP projections developed by the Organization for Economic Co-operation and Development (OECD) and population projections developed by the International Institute for Applied Systems Analysis (IIASA).<sup>12,13</sup> SI Table 8 lists the percentage changes in per-capita GDP between 2017 and 2050.

In addition to changes in income and population, the socio-economic pathways take into account changes in consumer preferences, agricultural technology, and policies.<sup>14,15</sup> The “sustainability” pathway with higher income growth includes greater increases in agricultural productivity, stricter land-use regulation, lower barriers to trade, and a trend towards healthier diets with more fruits and vegetables and less meat ; the less optimistic scenario includes changes in the opposite direction. SI Tables 9 and 10 provide an overview of the price and demand projections for the different socio-economic pathways, mapped to the food groups used in the analysis.

**SI Table 8.** Percentage changes in GDP per person between 2017 and 2050 by socio-economic pathway

| Socio-economic scenario | Global | High-income countries | Upper middle-income countries | Lower middle-income countries | Low-income countries |
|-------------------------|--------|-----------------------|-------------------------------|-------------------------------|----------------------|
| SSP2                    | 114    | 53                    | 116                           | 225                           | 270                  |
| SSP1                    | 179    | 65                    | 164                           | 348                           | 485                  |
| SSP3                    | 57     | 45                    | 68                            | 123                           | 134                  |

**SI Table 9.** Percentage changes in commodity prices between 2017 and 2050 by food group, region, and socio-economic pathway

| Food group         | Global |      |      | High-income countries |      |      | Upper middle-income countries |      |      | Lower middle-income countries |      |      | Low-income countries |      |      |
|--------------------|--------|------|------|-----------------------|------|------|-------------------------------|------|------|-------------------------------|------|------|----------------------|------|------|
|                    | SSP2   | SSP1 | SSP3 | SSP2                  | SSP1 | SSP3 | SSP2                          | SSP1 | SSP3 | SSP2                          | SSP1 | SSP3 | SSP2                 | SSP1 | SSP3 |
| wheat              | 12     | 0    | 26   | 9                     | -5   | 29   | 11                            | 0    | 23   | 12                            | 1    | 25   | 12                   | -1   | 28   |
| rice               | 13     | -2   | 36   | 5                     | -18  | 49   | 14                            | 6    | 22   | 17                            | 0    | 44   | 14                   | 6    | 23   |
| maize              | 30     | 23   | 38   | 29                    | 24   | 35   | 28                            | 24   | 29   | 30                            | 23   | 39   | 30                   | 25   | 34   |
| other grains       | 7      | -15  | 34   | 3                     | -16  | 21   | 3                             | -14  | 17   | 7                             | -15  | 36   | 6                    | -15  | 29   |
| roots              | 14     | 1    | 28   | 7                     | 6    | 4    | 10                            | 6    | 10   | 14                            | 0    | 30   | 15                   | 0    | 30   |
| fruits (temperate) | 12     | 33   | 13   | 9                     | 40   | -2   | 10                            | 39   | 2    | 12                            | 30   | 17   | 11                   | 34   | 7    |
| fruits (tropical)  | 12     | 29   | 26   | 10                    | 36   | 9    | 11                            | 34   | 13   | 13                            | 26   | 30   | 11                   | 30   | 19   |
| fruits (starchy)   | 6      | 23   | 17   | 4                     | 31   | 0    | 5                             | 28   | 5    | 6                             | 20   | 21   | 6                    | 22   | 13   |
| vegetables         | 29     | 43   | 29   | 26                    | 50   | 12   | 27                            | 49   | 16   | 29                            | 40   | 33   | 27                   | 44   | 22   |
| legumes            | 9      | 2    | 25   | 5                     | 7    | 7    | 6                             | 6    | 10   | 10                            | -1   | 32   | 7                    | 2    | 18   |
| nuts & seeds       | 4      | -9   | 20   | 2                     | -8   | 12   | 3                             | -6   | 10   | 4                             | -11  | 25   | 5                    | -6   | 16   |
| sugar              | 16     | 3    | 21   | 14                    | -4   | 27   | 18                            | 11   | 10   | 18                            | 2    | 27   | 18                   | 11   | 10   |
| vegetable oil      | 11     | 0    | 23   | 8                     | 8    | -1   | 7                             | 5    | 2    | 13                            | -3   | 32   | 9                    | 3    | 11   |
| palm oil           | 16     | 9    | 27   | 21                    | 22   | 11   | 16                            | 17   | 14   | 17                            | 5    | 35   | 14                   | 12   | 16   |
| eggs               | 0      | -5   | -8   | -1                    | -3   | -14  | -2                            | -4   | -13  | 0                             | -6   | -8   | 0                    | -6   | -8   |
| milk               | 5      | -1   | 8    | 4                     | -1   | 6    | 4                             | -2   | 6    | 5                             | -1   | 7    | 5                    | -1   | 8    |
| shellfish          | 7      | 7    | 8    | 11                    | 11   | 11   | 6                             | 6    | 6    | 8                             | 7    | 8    | 4                    | 4    | 4    |
| fish (freshwater)  | 8      | 8    | 7    | 9                     | 9    | 9    | 9                             | 9    | 8    | 7                             | 8    | 7    | 8                    | 8    | 8    |
| fish (pelagic)     | 35     | 36   | 35   | 21                    | 20   | 21   | 37                            | 37   | 38   | 40                            | 41   | 39   | 36                   | 37   | 36   |
| fish (demersal)    | 24     | 24   | 23   | 24                    | 24   | 24   | 25                            | 25   | 25   | 24                            | 25   | 24   | 26                   | 27   | 26   |
| poultry            | 5      | -33  | -8   | 4                     | -32  | -14  | 3                             | -33  | -13  | 5                             | -34  | -8   | 5                    | -34  | -8   |
| beef               | 4      | -13  | 0    | 3                     | -13  | -4   | 3                             | -13  | -3   | 4                             | -13  | 1    | 4                    | -13  | 0    |
| lamb               | -6     | -31  | -7   | -8                    | -31  | -11  | -7                            | -31  | -11  | -6                            | -31  | -7   | -6                   | -31  | -8   |
| pork               | 8      | -35  | 6    | 5                     | -36  | -1   | 8                             | -34  | 4    | 9                             | -35  | 7    | 8                    | -35  | 6    |
| other crops        | 15     | 10   | 19   | 15                    | 17   | 8    | 17                            | 17   | 13   | 10                            | 1    | 20   | 24                   | 24   | 20   |

**SI Table 10.** Percentage changes in food demand between 2017 and 2050 by food group, region, and socio-economic pathway

| Food group         | Global |      |      | High-income countries |      |      | Upper middle-income countries |      |      | Lower middle-income countries |      |      | Low-income countries |      |      |
|--------------------|--------|------|------|-----------------------|------|------|-------------------------------|------|------|-------------------------------|------|------|----------------------|------|------|
|                    | SSP2   | SSP1 | SSP3 | SSP2                  | SSP1 | SSP3 | SSP2                          | SSP1 | SSP3 | SSP2                          | SSP1 | SSP3 | SSP2                 | SSP1 | SSP3 |
| wheat              | 4      | 14   | -5   | 6                     | 10   | 1    | 2                             | 8    | -4   | 7                             | 16   | -1   | 13                   | 31   | -1   |
| rice               | -8     | -3   | -11  | -7                    | -4   | -8   | -1                            | 1    | -3   | -7                            | -2   | -14  | -18                  | -11  | -24  |
| maize              | 9      | 13   | 7    | 0                     | 0    | 0    | 0                             | 1    | 0    | 12                            | 20   | 6    | 5                    | 12   | 0    |
| other grains       | 33     | 43   | 27   | 1                     | 5    | 1    | -2                            | 3    | -5   | 26                            | 33   | 18   | 40                   | 60   | 23   |
| roots              | 9      | 17   | 2    | -2                    | -3   | -1   | -6                            | -5   | -8   | 10                            | 21   | -1   | 10                   | 20   | 0    |
| fruits (temperate) | 14     | 50   | -1   | 7                     | 40   | 9    | 12                            | 52   | 7    | 19                            | 41   | 2    | 31                   | 127  | 10   |
| fruits (tropical)  | 20     | 67   | 4    | 10                    | 39   | 10   | 16                            | 66   | 10   | 23                            | 60   | 6    | 64                   | 216  | 24   |
| fruits (starchy)   | 50     | 109  | 31   | 11                    | 42   | 12   | 22                            | 78   | 15   | 42                            | 84   | 22   | 69                   | 167  | 35   |
| vegetables         | 35     | 85   | 9    | 5                     | 39   | 8    | 9                             | 55   | 5    | 48                            | 97   | 13   | 21                   | 118  | 4    |
| legumes            | 25     | 41   | 14   | 5                     | 17   | 4    | 15                            | 30   | 9    | 24                            | 39   | 9    | 35                   | 63   | 16   |
| nuts & seeds       | 6      | 13   | -2   | 8                     | 10   | 6    | 3                             | 5    | 2    | 3                             | 12   | -7   | 20                   | 32   | 8    |
| sugar              | 25     | 13   | 9    | 7                     | -7   | 5    | 12                            | -13  | 7    | 43                            | 33   | 19   | 32                   | 39   | 19   |
| vegetable oil      | 4      | 2    | -6   | 1                     | -12  | 2    | 10                            | 4    | 5    | 8                             | 8    | -2   | 23                   | 31   | 9    |
| palm oil           | 60     | 56   | 34   | 19                    | 7    | 23   | 41                            | 24   | 28   | 66                            | 65   | 34   | 58                   | 68   | 31   |
| eggs               | 3      | 10   | -6   | -2                    | -2   | 2    | 7                             | 7    | 6    | 8                             | 15   | -3   | 47                   | 70   | 23   |
| milk               | 12     | 18   | -3   | 2                     | 0    | 0    | 6                             | 11   | -1   | 27                            | 35   | 11   | 31                   | 44   | 17   |
| shellfish          | 3      | 9    | -4   | 5                     | 6    | 4    | 28                            | 27   | 29   | 6                             | 11   | -1   | 16                   | 23   | 9    |
| fish (freshwater)  | 31     | 32   | 30   | 9                     | 10   | 8    | 35                            | 36   | 32   | 21                            | 24   | 17   | 61                   | 66   | 57   |
| fish (pelagic)     | -26    | -23  | -29  | -20                   | -19  | -19  | -13                           | -14  | -13  | -16                           | -16  | -16  | -53                  | -54  | -52  |
| fish (demersal)    | -14    | -10  | -19  | -14                   | -13  | -14  | 28                            | 27   | 29   | -9                            | -7   | -12  | -9                   | -4   | -13  |
| poultry            | 34     | 35   | 13   | 17                    | -12  | 20   | 28                            | 22   | 20   | 63                            | 82   | 30   | 73                   | 123  | 33   |
| beef               | 23     | 27   | 5    | 6                     | -4   | 6    | 10                            | 4    | 6    | 40                            | 52   | 17   | 90                   | 125  | 47   |
| lamb               | 49     | 57   | 28   | 27                    | -5   | 29   | 38                            | 38   | 23   | 42                            | 47   | 20   | 107                  | 177  | 64   |
| pork               | -7     | -12  | -19  | 0                     | -14  | -1   | 10                            | 13   | 1    | -10                           | -20  | -20  | 26                   | 54   | -1   |
| other crops        | 10     | 21   | -2   | 3                     | 4    | 3    | 13                            | 20   | 6    | 18                            | 27   | 9    | 32                   | 64   | 10   |

## SI.5 Health analysis and valuation

For estimating the healthcare-related costs of diets, we used a comparative risk assessment of diet and weight-related risk factors, and paired the estimates of cause-specific attributable deaths obtained from that assessment with cost-of-illness estimates.

In the comparative risk assessment, we estimated the mortality and disease burden attributable to dietary and weight-related risk factors by calculating population impact fractions (PIFs) which represent the proportions of disease cases that would be avoided when the risk exposure was changed from a baseline situation to a counterfactual situation. For calculating PIFs, we used the general formula<sup>16–18</sup>:

$$PIF = \frac{\int RR(x)P(x)dx - \int RR(x)P'(x)dx}{\int RR(x)P(x)dx}$$

where  $RR(x)$  is the relative risk of disease for risk factor level  $x$ ,  $P(x)$  is the number of people in the population with risk factor level  $x$  in the baseline scenario, and  $P'(x)$  is the number of people in the population with risk factor level  $x$  in the counterfactual scenario. We assumed that changes in relative risks follow a dose-response relationship,<sup>17</sup> and that PIFs combine multiplicatively, i.e.  $PIF = 1 - \prod_i(1 - PIF_i)$  where the  $i$ 's denote independent risk factors.<sup>17,19</sup>

The number of avoided deaths due to the change in risk exposure of risk  $i$ ,  $\Delta deaths_i$ , was calculated by multiplying the associated PIF by disease-specific death rates,  $DR$ , and by the number of people alive within a population,  $P$ :

$$\Delta deaths_i(r, a, d) = PIF_i(r, d) \cdot DR(r, a, d) \cdot P(r, a)$$

where PIFs are differentiated by region  $r$  and disease/cause of death  $d$ ; the death rates are differentiated by region, age group  $a$ , and disease; the population groups are differentiated by region and age group; and the change in the number of deaths is differentiated by region, age group and disease.

We used publicly available data sources to parameterize the comparative risk analysis. Mortality data were adopted from the Global Burden of Disease project.<sup>20,21</sup> Baseline data on the weight distribution in each country were adopted from a pooled analysis of population-based measurements undertaken by the NCD Risk Factor Collaboration.<sup>3</sup>

The relative risk estimates that relate the risk factors to the disease endpoints were adopted from meta-analyses of prospective cohort studies for dietary weight-related risks.<sup>22–30</sup> In line with the meta-analyses, we included non-linear dose-response relationships for fruits and vegetables, nuts and seeds, and fish, and assumed linear dose-response relationships for the remaining risk factors. As our analysis was primarily focused on mortality from chronic diseases, we focused on adults aged 20 year or older, and we adjusted the relative-risk estimates for attenuation with age based on a pooled analysis of cohort studies focussed on metabolic risk factors,<sup>31</sup> in line with other assessments.<sup>18,32</sup>

SI Table 11 provides an overview of the relative-risk parameters used. A detailed discussion of the parameter selection can be found elsewhere.<sup>33</sup> For ensuring that the relative risks are well-defined for the whole range of exposures considered in the diet scenarios, we capped the maximum exposure/potential risk reductions at the maximum values included in the meta-analyses (800 g/d of fruits or vegetables, 28 g/d of nuts, 50 g/d of fish). For whole grains, we used a maximum exposure of 125 g/d, in line with the TMREL value suggested by the Global Burden of Disease and the Nutrition and Chronic Diseases Expert Group (NutriCoDE),<sup>32</sup> and we left the linear dose-response functions (for legumes, red meat, and processed meat) unconstrained, but checked that the intake values didn't exceed the values covered in the meta-analyses.

The selection of risk-disease associations used in the health analysis was supported by available criteria used to judge the certainty of evidence, such as the Bradford-Hill criteria used by the Nutrition and Chronic Diseases Expert Group (NutriCoDE),<sup>32</sup> the World-Cancer-Research-Fund criteria used by the Global Burden of Disease project,<sup>34</sup> as well as NutriGrade (SI Table 12).<sup>35</sup> The quality of evidence in meta-analyses that covered the same risk-disease associations as used here was graded with NutriGrade as moderate or high for all risk-disease pairs included in the analysis.<sup>25–27</sup> In addition, the Nutrition and Chronic Diseases Expert Group graded the evidence for a causal association of ten of the 14 cardiometabolic risk associations included in the analysis as probable or convincing,<sup>32</sup> and the World Cancer

**SI Table 11.** Relative risk parameters (mean and low and high values of 95% confidence intervals) for dietary risks and weight-related risks. We used non-linear dose-response relationships for fruits and vegetables, nuts and seeds, and fish as specified in the references, and we used linear dose-response relationships for the remaining risk factors.

| Food group        | Endpoint            | Unit        | RR mean | RR low | RR high | Reference                   |
|-------------------|---------------------|-------------|---------|--------|---------|-----------------------------|
| Processed meat    | CHD                 | 50 g/d      | 1.27    | 1.09   | 1.49    | Bechthold et al (2019)      |
|                   | Stroke              | 50 g/d      | 1.17    | 1.02   | 1.34    | Bechthold et al (2019)      |
|                   | Colorectal cancer   | 50 g/d      | 1.17    | 1.10   | 1.23    | Schwingshackl et al (2018)  |
|                   | Type 2 diabetes     | 50 g/d      | 1.37    | 1.22   | 1.55    | Schwingshackl et al (2017)  |
| Red meat          | CHD                 | 100 g/d     | 1.15    | 1.08   | 1.23    | Bechthold et al (2019)      |
|                   | Stroke              | 100 g/d     | 1.12    | 1.06   | 1.17    | Bechthold et al (2019)      |
|                   | Colorectal cancer   | 100 g/d     | 1.12    | 1.06   | 1.19    | Schwingshackl et al (2018)  |
|                   | Type 2 diabetes     | 100 g/d     | 1.17    | 1.08   | 1.26    | Schwingshackl et al (2017)  |
| Fish              | CHD                 | 15 g/d      | 0.94    | 0.90   | 0.98    | Zheng et al (2012)          |
| Fruits            | CHD                 | 100 g/d     | 0.95    | 0.92   | 0.99    | Aune et al (2017)           |
|                   | Stroke              | 100 g/d     | 0.77    | 0.70   | 0.84    | Aune et al (2017)           |
|                   | Cancer              | 100 g/d     | 0.94    | 0.91   | 0.97    | Aune et al (2017)           |
| Vegetables        | CHD                 | 100 g/d     | 0.84    | 0.80   | 0.88    | Aune et al (2017)           |
|                   | Cancer              | 100 g/d     | 0.93    | 0.91   | 0.95    | Aune et al (2017)           |
| Legumes           | CHD                 | 57 g/d      | 0.86    | 0.78   | 0.94    | Afshin et al (2014)         |
| Nuts              | CHD                 | 28 g/d      | 0.71    | 0.63   | 0.80    | Aune et al (2016)           |
| Whole grains      | CHD                 | 30 g/d      | 0.87    | 0.85   | 0.90    | Aune et al (2016b)          |
|                   | Cancer              | 30 g/d      | 0.95    | 0.93   | 0.97    | Aune et al (2016b)          |
|                   | Type 2 diabetes     | 30 g/d      | 0.65    | 0.61   | 0.70    | Aune et al (2016b)          |
| Underweight       | CHD                 | 15<BMI<18.5 | 1.17    | 1.09   | 1.24    | Global BMI Collab (2016)    |
|                   | Stroke              | 15<BMI<18.5 | 1.37    | 1.23   | 1.53    | Global BMI Collab (2016)    |
|                   | Cancer              | 15<BMI<18.5 | 1.10    | 1.05   | 1.16    | Global BMI Collab (2016)    |
|                   | Respiratory disease | 15<BMI<18.5 | 2.73    | 2.31   | 3.23    | Global BMI Collab (2016)    |
| Overweight        | CHD                 | 25<BMI<30   | 1.34    | 1.32   | 1.35    | Global BMI Collab (2016)    |
|                   | Stroke              | 25<BMI<30   | 1.11    | 1.09   | 1.14    | Global BMI Collab (2016)    |
|                   | Cancer              | 25<BMI<30   | 1.10    | 1.09   | 1.12    | Global BMI Collab (2016)    |
|                   | Respiratory disease | 25<BMI<30   | 0.90    | 0.87   | 0.94    | Global BMI Collab (2016)    |
|                   | Type 2 diabetes     | 25<BMI<30   | 1.88    | 1.56   | 2.11    | Prosp Studies Collab (2009) |
| Obesity (grade 1) | CHD                 | 30<BMI<35   | 2.02    | 1.91   | 2.13    | Global BMI Collab (2016)    |
|                   | Stroke              | 30<BMI<35   | 1.46    | 1.39   | 1.54    | Global BMI Collab (2016)    |
|                   | Cancer              | 30<BMI<35   | 1.31    | 1.28   | 1.34    | Global BMI Collab (2016)    |
|                   | Respiratory disease | 30<BMI<35   | 1.16    | 1.08   | 1.24    | Global BMI Collab (2016)    |
|                   | Type 2 diabetes     | 30<BMI<35   | 3.53    | 2.43   | 4.45    | Prosp Studies Collab (2009) |
| Obesity (grade 2) | CHD                 | 30<BMI<35   | 2.81    | 2.63   | 3.01    | Global BMI Collab (2016)    |
|                   | Stroke              | 30<BMI<35   | 2.11    | 1.93   | 2.30    | Global BMI Collab (2016)    |
|                   | Cancer              | 30<BMI<35   | 1.57    | 1.50   | 1.63    | Global BMI Collab (2016)    |
|                   | Respiratory disease | 30<BMI<35   | 1.79    | 1.60   | 1.99    | Global BMI Collab (2016)    |
|                   | Type 2 diabetes     | 30<BMI<35   | 6.64    | 3.80   | 9.39    | Prosp Studies Collab (2009) |
| Obesity (grade 3) | CHD                 | 30<BMI<35   | 3.81    | 3.47   | 4.17    | Global BMI Collab (2016)    |
|                   | Stroke              | 30<BMI<35   | 2.33    | 2.05   | 2.65    | Global BMI Collab (2016)    |
|                   | Cancer              | 30<BMI<35   | 1.96    | 1.83   | 2.09    | Global BMI Collab (2016)    |
|                   | Respiratory disease | 30<BMI<35   | 2.85    | 2.43   | 3.34    | Global BMI Collab (2016)    |
|                   | Type 2 diabetes     | 30<BMI<35   | 12.49   | 5.92   | 19.82   | Prosp Studies Collab (2009) |

Research Fund graded all five of the cancer associations as probable or convincing.<sup>36</sup> The certainty of evidence grading in each case relates to the general relationship between a risk factor and a health outcome, and not to a specific relative-risk value.

We did not include all available risk-disease associations that were graded as having a moderate certainty of evidence and showed statistically significant results in the meta-analyses that included NutriGrade assessments.<sup>25–27</sup> That was because for some associations, such as for milk, more detailed meta-analyses (with more sensitivity analyses) were available that indicated potential confounding with other major dietary risks.<sup>37,38</sup> Such sensitivity analyses were not presented in the meta-analyses that included NutriGrade assessments, but they are important for health assessments that evaluate changes in multiple risk factors.

For the different diet scenarios, we calculated uncertainty intervals associated with changes in mortality based on standard methods of error propagation and the confidence intervals of the relative risk parameters. For the error propagation, we approximated the error distribution of the relative risks by a normal distribution and used that side of deviations from the mean which was largest. This method leads to conservative and potentially larger uncertainty intervals as probabilistic methods, such as Monte Carlo sampling, but it has significant computational advantages, and is justified for the magnitude of errors dealt with here (<50%) (see e.g. IPCC Uncertainty Guidelines).

**SI Table 12.** Overview of existing ratings on the certainty of evidence for a statistically significant association between a risk factor and a disease endpoint. The ratings include those of the Nutrition and Chronic Diseases Expert Group (NutriCoDE),<sup>32</sup> the World Cancer Research Fund,<sup>36</sup> and NutriGrade.<sup>25–27</sup> The ratings relate to the risk-disease associations in general, and not to the specific relative-risk factor used for those associations in this analysis.

| Food group     | Endpoint        | Association | Certainty of evidence                                                                                                                               |
|----------------|-----------------|-------------|-----------------------------------------------------------------------------------------------------------------------------------------------------|
| Fruits         | CHD             | reduction   | NutriCoDE: probable or convincing;<br>NutriGrade: moderate quality of meta-evidence                                                                 |
|                | Stroke          | reduction   | NutriCoDE: probable or convincing<br>NutriGrade: moderate quality of meta-evidence                                                                  |
|                | Cancer          | reduction   | WCRF: strong evidence (probable) for some cancers<br>NutriGrade: moderate quality of meta-evidence for colorectal cancer                            |
| Vegetables     | CHD             | reduction   | NutriCoDE: probable or convincing<br>NutriGrade: moderate quality of meta-evidence                                                                  |
|                | Cancer          | reduction   | WCRF: strong evidence (probable) for non-starchy vegetables and some cancers<br>NutriGrade: moderate quality of meta-evidence for colorectal cancer |
| Legumes        | CHD             | reduction   | NutriCoDE: probable or convincing<br>NutriGrade: moderate quality of meta-evidence                                                                  |
| Nuts and seeds | CHD             | reduction   | NutriCoDE: probable or convincing<br>NutriGrade: moderate quality of meta-evidence                                                                  |
| Whole grains   | CHD             | reduction   | NutriCoDE: probable or convincing<br>NutriGrade: moderate quality of meta-evidence                                                                  |
|                | Cancer          | reduction   | WCRF: strong evidence (probable) for colorectal cancer<br>NutriGrade: moderate quality of meta-evidence for colorectal cancer                       |
|                | Type-2 diabetes | reduction   | NutriCoDE: probable or convincing<br>NutriGrade: high quality of meta-evidence                                                                      |
| Fish           | CHD             | reduction   | NutriCoDE: probable or convincing<br>NutriGrade: moderate quality of meta-evidence                                                                  |
| Red meat       | CHD             | increase    | NutriGrade: moderate quality of meta-evidence                                                                                                       |
|                | Stroke          | increase    | NutriGrade: moderate quality of meta-evidence                                                                                                       |
|                | Cancer          | increase    | WCRF: strong evidence (probable) for colorectal cancer<br>NutriGrade: moderate quality of meta-evidence for colorectal cancer                       |
|                | Type-2 diabetes | increase    | NutriCoDE: probable or convincing<br>NutriGrade: high quality of meta-evidence                                                                      |
| Processed meat | CHD             | increase    | NutriCoDE: probable or convincing<br>NutriGrade: moderate quality of meta-evidence                                                                  |
|                | Stroke          | increase    | NutriGrade: moderate quality of meta-evidence                                                                                                       |
|                | Cancer          | increase    | WCRF: strong evidence (convincing) for colorectal cancer<br>NutriGrade: moderate quality of meta-evidence for colorectal cancer                     |
|                | Type-2 diabetes | increase    | NutriGrade: high quality of meta-evidence                                                                                                           |

NutriCoDE: Nutrition and Chronic Diseases Expert Group

NutriGrade: Grading of Recommendations Assessment, Development, and Evaluation (GRADE) tailored to nutrition research

WCRF: World Cancer Research Fund



For valuing the health impacts of diets, we paired cause-specific estimates of attributable deaths in each dietary scenario to a set of cost-of-illness estimates. Cost-of-illness estimates capture both the direct and indirect costs associated with treating a specific disease, including medical and health-care costs (direct), and costs of informal care and from lost working days (indirect) (see e.g. ref <sup>39</sup>). For our calculations, we used a global set of country-specific cost-of-illness estimates adopted from Springmann and colleagues.<sup>40</sup> The dataset is based on detailed cost-of-illness estimates for cardiovascular diseases <sup>39,41</sup> and cancer <sup>42</sup> across the European Union <sup>39,41 42</sup> which were transferred to other regions and years by scaling the base values by the ratio of health expenditure per capita for direct costs, and by the ratio of GDP per capita (adjusted for purchasing power parity) for indirect costs. The dataset also includes country-specific cost estimates for diabetes <sup>43</sup> that were adjusted for co-morbidities to avoid double-counting of CVD-related complications <sup>44,45</sup>. SI Table 13 provides an overview of the cost-of-illness estimates used in the analysis.

**SI Table 13.** Healthcare-related costs (USD per case of death) by region, cause of death, and cost component in 2017 and 2050.

| Region | Cause  | 2017    |         |          |                   |                 | 2050    |         |          |                   |                 |
|--------|--------|---------|---------|----------|-------------------|-----------------|---------|---------|----------|-------------------|-----------------|
|        |        | total   | direct  | indirect | indirect (labour) | indirect (care) | total   | direct  | indirect | indirect (labour) | indirect (care) |
| Global | CHD    | 54,103  | 17,231  | 36,966   | 16,071            | 20,895          | 127,021 | 44,258  | 83,357   | 36,238            | 47,118          |
|        | Stroke | 50,219  | 24,332  | 25,906   | 10,953            | 14,954          | 120,473 | 62,498  | 58,418   | 24,698            | 33,720          |
|        | Cancer | 61,720  | 24,156  | 37,628   | 26,014            | 11,615          | 146,278 | 62,046  | 84,851   | 58,660            | 26,192          |
|        | T2DM   | 79,156  | 79,156  |          |                   |                 | 183,546 | 183,546 |          |                   |                 |
| HIC    | CHD    | 183,155 | 74,548  | 107,817  | 46,873            | 60,945          | 334,851 | 168,156 | 166,695  | 72,469            | 94,226          |
|        | Stroke | 181,592 | 105,270 | 75,560   | 31,945            | 43,615          | 354,278 | 237,456 | 116,822  | 49,390            | 67,432          |
|        | Cancer | 215,203 | 104,509 | 109,750  | 75,874            | 33,877          | 405,423 | 235,740 | 169,683  | 117,308           | 52,377          |
|        | T2DM   | 430,552 | 430,552 |          |                   |                 | 976,117 | 976,117 |          |                   |                 |
| UMC    | CHD    | 62,764  | 18,028  | 46,156   | 20,066            | 26,090          | 152,032 | 56,333  | 99,443   | 43,232            | 56,211          |
|        | Stroke | 56,902  | 25,458  | 32,347   | 13,676            | 18,671          | 146,616 | 79,548  | 69,692   | 29,464            | 40,227          |
|        | Cancer | 70,870  | 25,274  | 46,983   | 32,481            | 14,503          | 176,388 | 78,973  | 101,226  | 69,981            | 31,246          |
|        | T2DM   | 56,810  | 56,810  |          |                   |                 | 191,863 | 191,863 |          |                   |                 |
| LMC    | CHD    | 29,671  | 5,801   | 23,879   | 10,381            | 13,498          | 101,383 | 22,351  | 79,186   | 34,425            | 44,760          |
|        | Stroke | 24,927  | 8,192   | 16,735   | 7,075             | 9,660           | 86,924  | 31,562  | 55,495   | 23,462            | 32,033          |
|        | Cancer | 32,435  | 8,133   | 24,307   | 16,804            | 7,503           | 111,769 | 31,334  | 80,605   | 55,725            | 24,881          |
|        | T2DM   | 11,246  | 11,246  |          |                   |                 | 41,843  | 41,843  |          |                   |                 |
| LIC    | CHD    | 8,442   | 1,908   | 6,594    | 2,867             | 3,728           | 34,432  | 9,654   | 24,976   | 10,858            | 14,118          |
|        | Stroke | 7,261   | 2,695   | 4,621    | 1,954             | 2,668           | 30,925  | 13,633  | 17,503   | 7,400             | 10,103          |
|        | Cancer | 9,319   | 2,675   | 6,713    | 4,641             | 2,072           | 38,717  | 13,534  | 25,423   | 17,576            | 7,848           |
|        | T2DM   | 2,229   | 2,229   |          |                   |                 | 11,137  | 11,137  |          |                   |                 |

## SI.6 Climate-change analysis and valuation

For estimating the climate-change costs of diets, we first calculated the GHG emissions associated with food consumption and then paired those with cost estimates of climate damages.

For the calculation of GHG emissions, we adopted a regionalised, country-level set of emissions factors derived from a comprehensive meta-analysis of life-cycle assessments of food products.<sup>46</sup> The assessments included all main emissions (carbon dioxide, methane, nitrous oxide) and sources along the food supply chain, from deforestation, pesticide and fertilizer production and transport to farm, fertilizer application and related emissions, energy use on farm, animal production and aquaculture emissions, food processing, food packaging, food transport, and food retail. The data has been weighted and resampled to ensure the representativeness of impacts in line with national and global statistics.

We accounted for improvements in the emissions intensities of foods over time by incorporating the mitigation potential of bottom-up changes in management practices and technologies from marginal abatement cost curves,<sup>47</sup> in line with previous assessments.<sup>48</sup> The mitigation options included changes in irrigation, cropping and fertilization that reduce methane and nitrous oxide emissions for rice and other crops, as well as changes in manure management, feed conversion and feed additives that reduce enteric fermentation in livestock. SI Table 14 provides an overview of the emissions footprints used in the analysis.

For monetizing the GHG emissions, we used estimates of the social cost of carbon (SCC) which represents the economic cost caused by an additional ton of GHG emissions. Compared to our earlier study<sup>40</sup>, we used estimates from a fully revised version of the Dynamic Integrated model of Climate and the Economy (DICE) for a scenario that constrains future temperature rise (with the temperature limit averaged over 100 y) in line with stated policy goals.<sup>49</sup> The SCC values in that scenario were USD/tCO<sub>2</sub>-eq 107, 204, and 543 for the years 2015, 2030, and 2050. An alternative would have been to adopt SCC values obtained for different discount rates (that are used to convert future damages to present values) for a reference path with current policies, or to adopt SCC values for an “optimal control” path, but

neither of these options fulfilled stated policy objectives with respect to limiting climate change.

**SI Table 14.** GHG emissions footprints (kgCO<sub>2</sub>-eq per kg of product) by food commodity and region.

| Commodities      | 2017   |       |       |       |       | 2050   |       |       |       |       |
|------------------|--------|-------|-------|-------|-------|--------|-------|-------|-------|-------|
|                  | Global | HIC   | UMC   | LMC   | LIC   | Global | HIC   | UMC   | LMC   | LIC   |
| wheat            | 1.70   | 1.62  | 1.62  | 1.62  | 2.34  | 1.58   | 1.39  | 1.44  | 1.49  | 2.27  |
| rice             | 3.69   | 2.86  | 3.93  | 3.83  | 3.94  | 2.55   | 1.67  | 2.48  | 2.79  | 2.78  |
| maize            | 1.33   | 0.68  | 1.26  | 1.27  | 2.91  | 1.39   | 0.59  | 1.15  | 1.26  | 3.06  |
| other grains     | 1.57   | 1.61  | 1.60  | 1.56  | 1.47  | 1.36   | 1.38  | 1.44  | 1.35  | 1.27  |
| roots            | 0.57   | 0.59  | 0.62  | 0.50  | 0.79  | 0.62   | 0.59  | 0.63  | 0.54  | 0.87  |
| temperate fruits | 0.66   | 0.64  | 0.66  | 0.67  | 0.64  | 0.67   | 0.65  | 0.67  | 0.69  | 0.62  |
| tropical fruits  | 0.58   | 0.51  | 0.83  | 0.51  | 0.50  | 0.58   | 0.51  | 0.84  | 0.51  | 0.47  |
| starchy fruits   | 0.72   | 0.70  | 0.86  | 0.67  | 0.66  | 0.72   | 0.70  | 0.86  | 0.68  | 0.66  |
| vegetables       | 0.78   | 0.72  | 0.87  | 0.72  | 0.99  | 0.84   | 0.73  | 0.88  | 0.78  | 1.13  |
| legumes          | 2.04   | 1.83  | 1.57  | 2.39  | 1.79  | 1.68   | 1.49  | 1.43  | 1.92  | 1.49  |
| treenuts         | 1.66   | 0.04  | 4.53  | 1.18  | 0.58  | 1.62   | 0.02  | 4.67  | 1.14  | 0.36  |
| groundnuts       | 2.39   | 2.08  | 3.33  | 2.12  | 2.11  | 2.39   | 2.08  | 3.36  | 2.14  | 2.12  |
| vegetable oils   | 6.49   | 5.00  | 6.21  | 6.95  | 7.49  | 6.55   | 4.96  | 6.31  | 6.93  | 7.30  |
| palm oil         | 7.20   | 7.69  | 5.62  | 7.71  | 7.32  | 7.13   | 7.69  | 5.52  | 7.66  | 7.20  |
| sugar            | 2.26   | 1.46  | 2.98  | 2.10  | 2.84  | 2.40   | 1.44  | 3.03  | 2.20  | 3.13  |
| beef             | 48.25  | 34.91 | 69.40 | 44.20 | 44.93 | 42.44  | 29.80 | 66.23 | 37.14 | 37.54 |
| lamb             | 30.58  | 22.50 | 49.64 | 25.72 | 26.26 | 27.67  | 18.58 | 47.04 | 23.20 | 23.08 |
| pork             | 7.85   | 6.83  | 8.73  | 7.69  | 8.53  | 7.11   | 5.55  | 8.26  | 6.96  | 7.52  |
| poultry          | 7.23   | 5.32  | 7.00  | 8.03  | 7.40  | 6.33   | 4.27  | 6.58  | 7.05  | 5.75  |
| eggs             | 4.51   | 4.25  | 4.09  | 4.75  | 4.80  | 3.99   | 3.45  | 3.81  | 4.23  | 3.99  |
| milk             | 2.92   | 2.58  | 3.66  | 2.66  | 3.12  | 2.67   | 2.17  | 3.46  | 2.39  | 2.85  |
| cream            | 2.89   | 2.58  | 3.66  | 2.64  | 2.96  | 2.62   | 2.17  | 3.46  | 2.36  | 2.64  |
| cheese           | 22.34  | 18.47 | 29.42 | 20.03 | 24.31 | 20.62  | 15.80 | 27.84 | 18.03 | 22.95 |
| butter           | 2.89   | 2.58  | 3.66  | 2.64  | 2.96  | 2.62   | 2.17  | 3.46  | 2.36  | 2.64  |
| shellfish        | 10.06  | 8.20  | 14.05 | 9.17  | 8.92  | 9.97   | 8.20  | 14.30 | 8.88  | 8.97  |
| freshwater fish  | 2.99   | 1.88  | 2.53  | 3.71  | 2.59  | 3.02   | 1.92  | 2.55  | 3.76  | 2.46  |
| pelagic fish     | 2.99   | 1.88  | 2.53  | 3.71  | 2.59  | 3.02   | 1.92  | 2.55  | 3.76  | 2.46  |
| demersal fish    | 2.99   | 1.88  | 2.53  | 3.71  | 2.59  | 3.02   | 1.92  | 2.55  | 3.76  | 2.46  |

## SI.7 Supplementary results

**SI Figure 1.** Prices per serving (top) and calorie (bottom) of food groups in 2017 by world region, including high-income (HIC), upper middle-income (UMC), lower middle-income (LMC), and low-income (LIC) countries, as well as a global average (Avg).

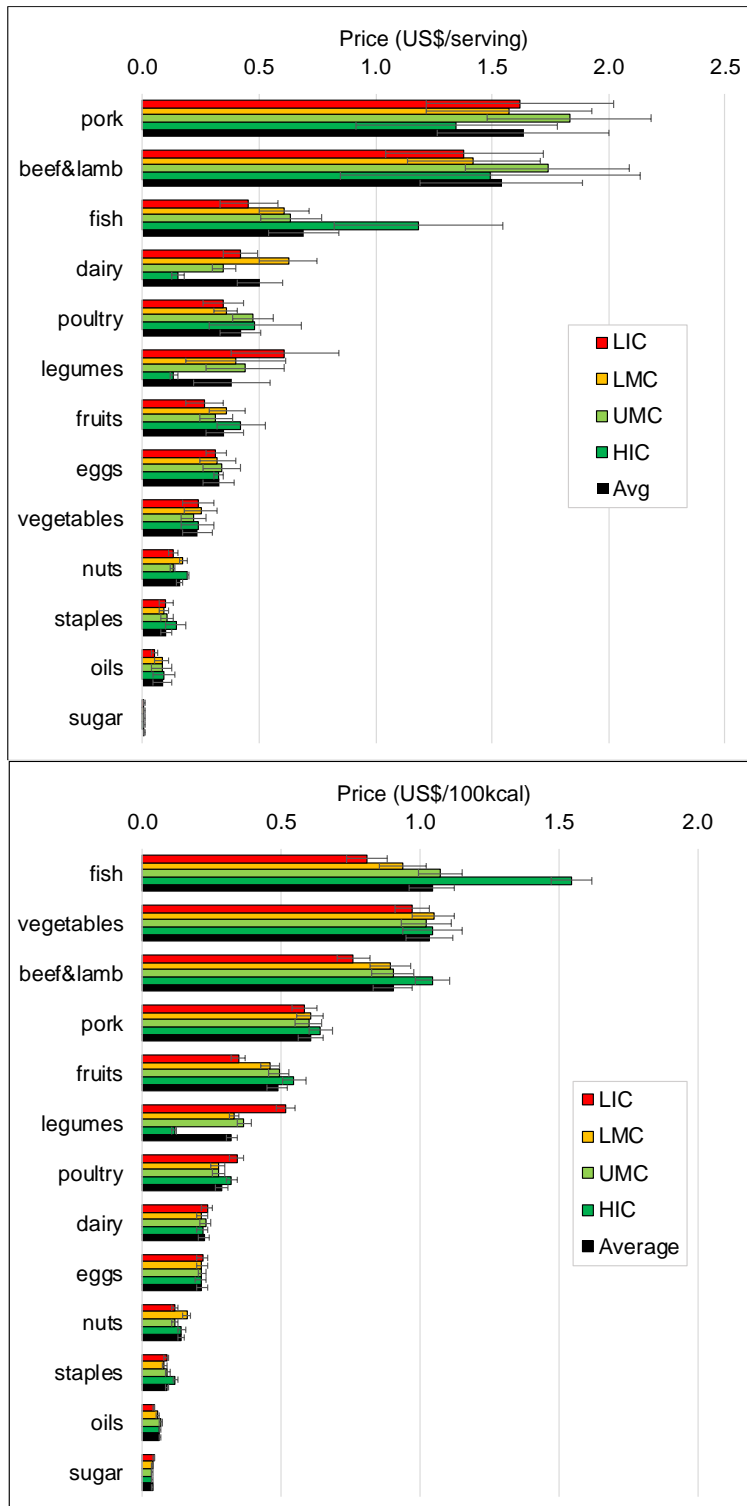

**SI Figure 2.** Average cost of diets in 2017 differentiated by food consumed and food wasted.

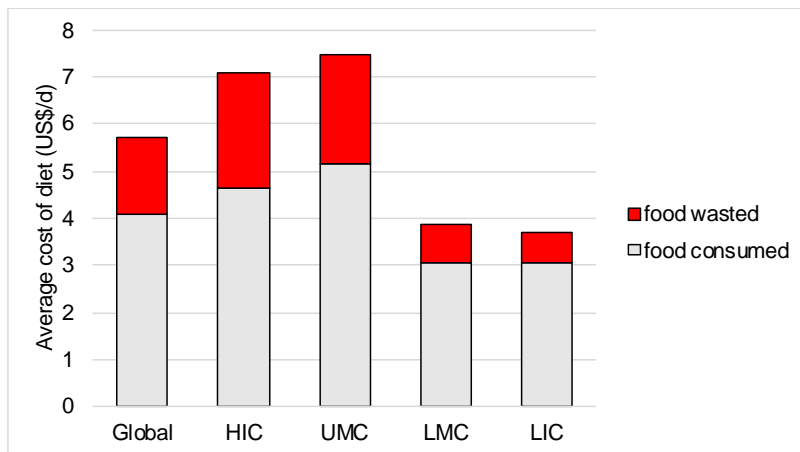

**SI Figure 3.** Cost of diets in 2017 and 2050 by world region grouped by income, food group, and socio-economic development pathway (med, high, low).

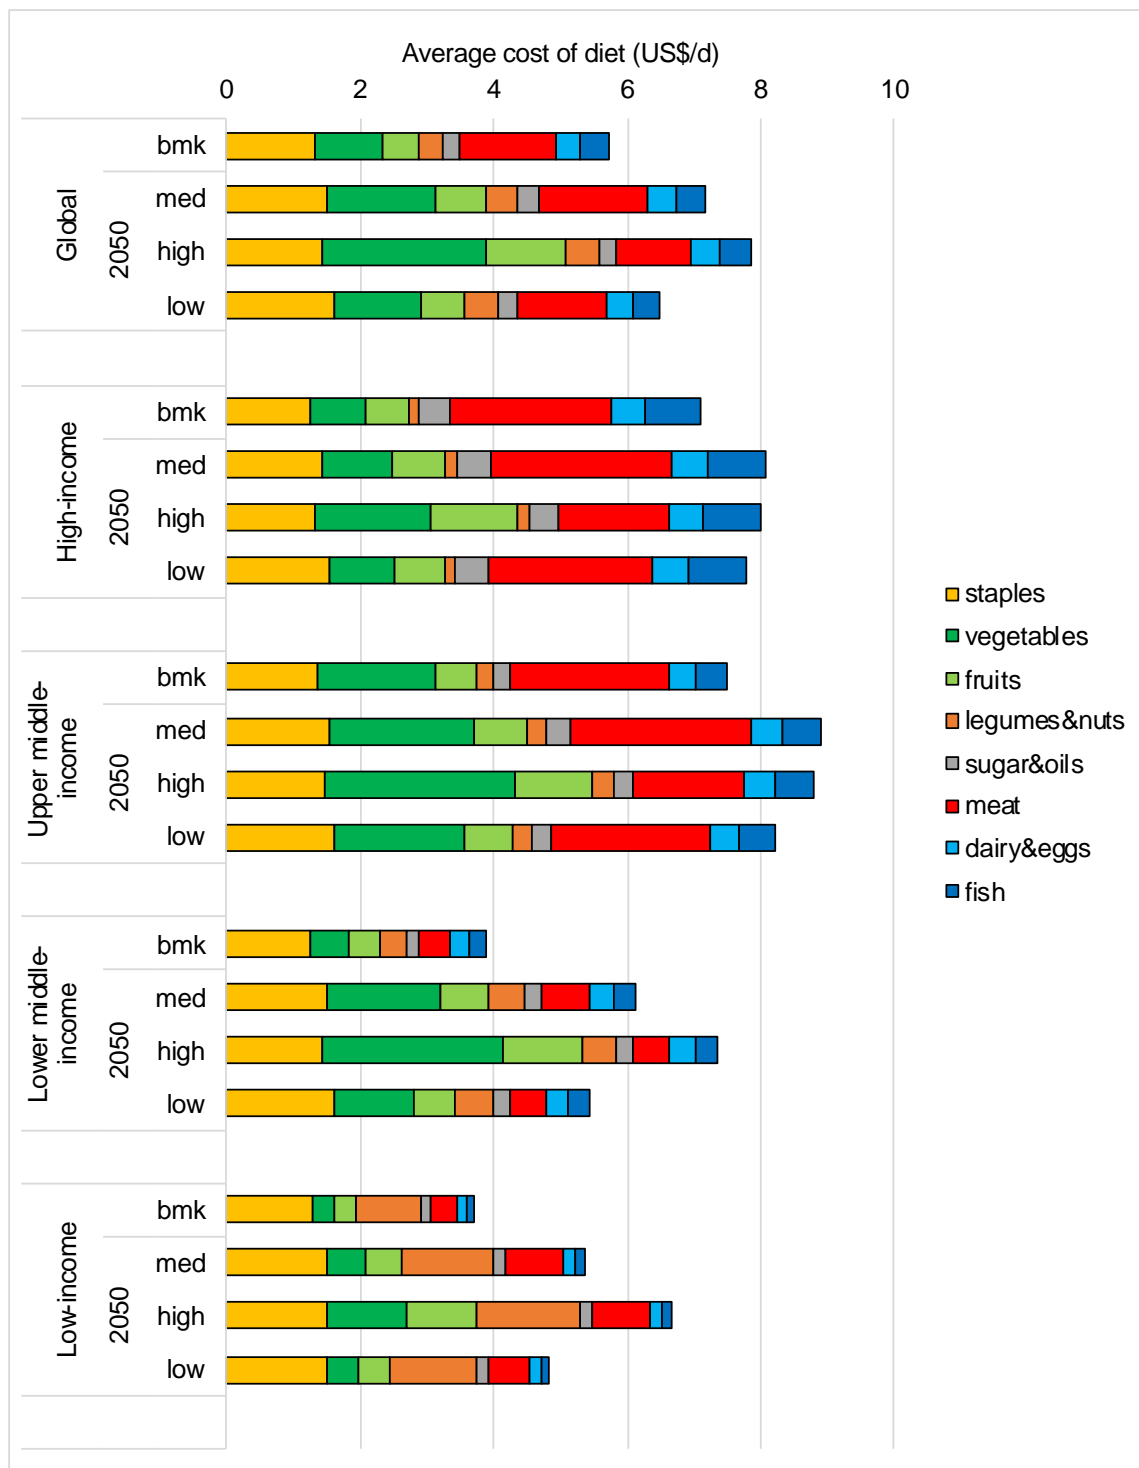

**SI Figure 4.** Preventable deaths (in thousands) by scenario, cause of deaths, and risk factor. The causes of deaths include coronary heart disease (CHD), stroke, cancer, and type-2 diabetes mellitus (T2DM).

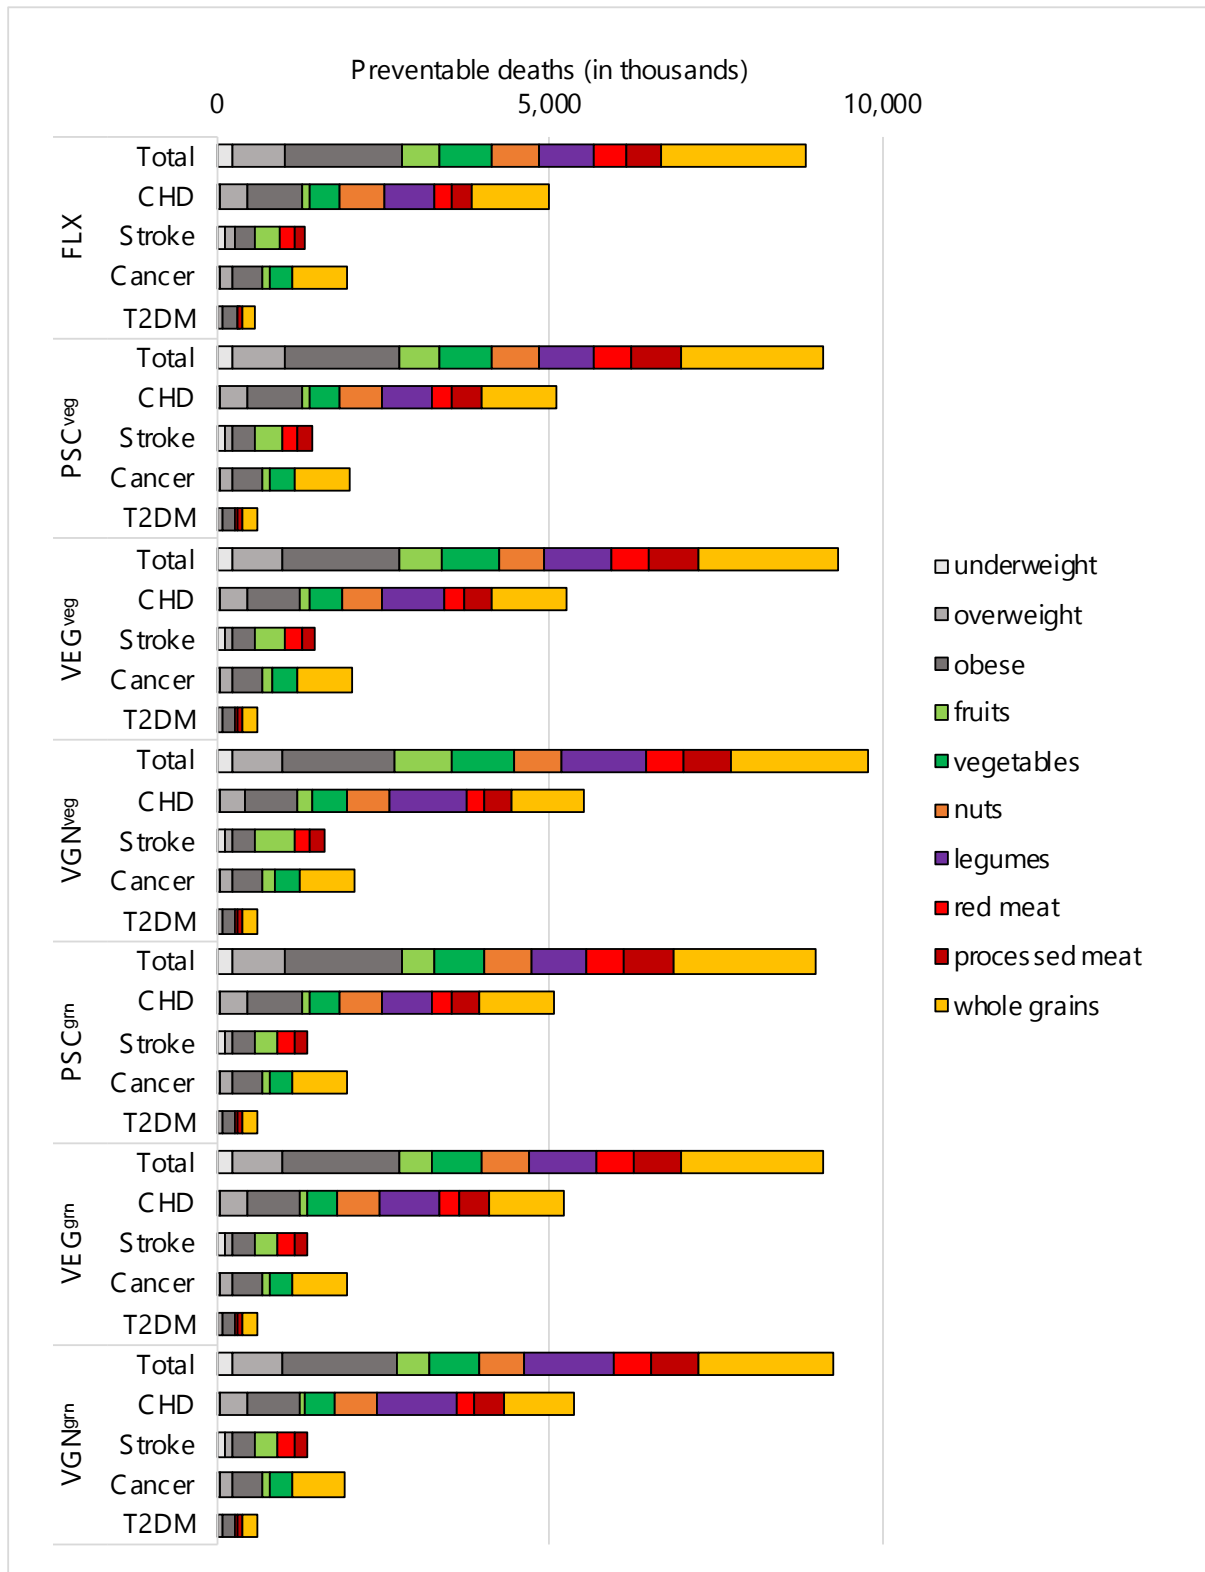

**SI Table 15.** Healthcare-related costs by world region, scenario, year and socio-economic pathway.

| Region              | Scenario           | Total costs (US \$ billion per year) |               |                |               | Costs per person (US \$ per year) |               |                |               |
|---------------------|--------------------|--------------------------------------|---------------|----------------|---------------|-----------------------------------|---------------|----------------|---------------|
|                     |                    | 2017<br>(bmk)                        | 2050<br>(med) | 2050<br>(high) | 2050<br>(low) | 2017<br>(bmk)                     | 2050<br>(med) | 2050<br>(high) | 2050<br>(low) |
| Global              | BMK                | 662.5                                | 2,038.4       | 1,858.3        | 2,845.2       | 91.1                              | 223.1         | 220.5          | 286.6         |
|                     | PSC <sup>veg</sup> | 91.4                                 | 204.9         | 181.6          | 283.8         | 12.6                              | 22.4          | 21.5           | 28.6          |
|                     | PSC <sup>gm</sup>  | 79.4                                 | 165.1         | 150.1          | 264.9         | 10.9                              | 18.1          | 17.8           | 26.7          |
|                     | FLX                | 67.5                                 | 129.1         | 119.0          | 227.9         | 9.3                               | 14.1          | 14.1           | 23.0          |
|                     | VGN <sup>veg</sup> | 47.8                                 | 82.2          | 82.2           | 174.1         | 6.6                               | 9.0           | 9.8            | 17.5          |
|                     | VEG <sup>veg</sup> | 83.2                                 | 178.7         | 175.6          | 271.2         | 11.4                              | 19.6          | 20.8           | 27.3          |
|                     | VEG <sup>gm</sup>  | 76.9                                 | 161.4         | 162.8          | 248.9         | 10.6                              | 17.7          | 19.3           | 25.1          |
|                     | VGN <sup>gm</sup>  | 67.4                                 | 133.9         | 141.4          | 214.5         | 9.3                               | 14.7          | 16.8           | 21.6          |
| High-income         | BMK                | 410.7                                | 1,021.0       | 927.2          | 1,601.3       | 376.2                             | 811.6         | 722.6          | 1,494.0       |
|                     | PSC <sup>veg</sup> | 60.7                                 | 64.0          | 46.4           | 153.5         | 55.6                              | 50.9          | 36.2           | 143.3         |
|                     | PSC <sup>gm</sup>  | 58.0                                 | 53.3          | 43.1           | 156.0         | 53.1                              | 42.3          | 33.6           | 145.5         |
|                     | FLX                | 51.5                                 | 39.8          | 32.7           | 140.0         | 47.1                              | 31.6          | 25.5           | 130.6         |
|                     | VGN <sup>veg</sup> | 45.0                                 | 35.5          | 36.1           | 129.7         | 41.2                              | 28.2          | 28.1           | 121.0         |
|                     | VEG <sup>veg</sup> | 56.4                                 | 55.7          | 46.5           | 150.9         | 51.7                              | 44.3          | 36.2           | 140.8         |
|                     | VEG <sup>gm</sup>  | 53.3                                 | 49.3          | 41.9           | 142.8         | 48.8                              | 39.2          | 32.7           | 133.2         |
|                     | VGN <sup>gm</sup>  | 47.5                                 | 37.8          | 33.8           | 128.2         | 43.5                              | 30.0          | 26.3           | 119.7         |
| Upper middle-income | BMK                | 118.4                                | 447.9         | 299.7          | 478.8         | 117.1                             | 388.3         | 279.2          | 380.5         |
|                     | PSC <sup>veg</sup> | 9.0                                  | 49.3          | 31.2           | 44.0          | 8.9                               | 42.8          | 29.0           | 35.0          |
|                     | PSC <sup>gm</sup>  | 6.9                                  | 44.8          | 30.7           | 42.0          | 6.9                               | 38.8          | 28.5           | 33.4          |
|                     | FLX                | 6.3                                  | 42.0          | 27.8           | 38.7          | 6.2                               | 36.4          | 25.9           | 30.7          |
|                     | VGN <sup>veg</sup> | 1.6                                  | 34.8          | 25.8           | 29.5          | 1.6                               | 30.2          | 24.1           | 23.5          |
|                     | VEG <sup>veg</sup> | 7.4                                  | 43.9          | 30.1           | 41.7          | 7.3                               | 38.1          | 28.1           | 33.1          |
|                     | VGN <sup>gm</sup>  | 6.3                                  | 41.4          | 28.6           | 38.7          | 6.2                               | 35.9          | 26.6           | 30.7          |
|                     | VEG <sup>gm</sup>  | 4.4                                  | 36.9          | 25.7           | 33.4          | 4.3                               | 32.0          | 23.9           | 26.6          |
| Lower middle-income | BMK                | 128.8                                | 532.3         | 584.4          | 721.1         | 31.6                              | 106.9         | 128.3          | 129.7         |
|                     | PSC <sup>veg</sup> | 21.4                                 | 87.4          | 100.8          | 81.2          | 5.2                               | 17.5          | 22.1           | 14.6          |
|                     | PSC <sup>gm</sup>  | 14.1                                 | 63.5          | 73.6           | 62.6          | 3.4                               | 12.7          | 16.2           | 11.3          |
|                     | VGN <sup>veg</sup> | 9.5                                  | 45.0          | 56.8           | 45.7          | 2.3                               | 9.0           | 12.5           | 8.2           |
|                     | FLX                | 1.1                                  | 9.8           | 19.5           | 12.3          | 0.3                               | 2.0           | 4.3            | 2.2           |
|                     | VEG <sup>veg</sup> | 19.2                                 | 75.6          | 96.2           | 73.9          | 4.7                               | 15.2          | 21.1           | 13.3          |
|                     | VGN <sup>gm</sup>  | 17.1                                 | 67.7          | 89.8           | 63.2          | 4.2                               | 13.6          | 19.7           | 11.4          |
|                     | VEG <sup>gm</sup>  | 15.4                                 | 56.6          | 79.8           | 48.9          | 3.8                               | 11.4          | 17.5           | 8.8           |
| Low-income          | BMK                | 4.7                                  | 37.3          | 46.7           | 43.9          | 4.4                               | 22.0          | 31.6           | 22.2          |
|                     | PSC <sup>veg</sup> | 0.3                                  | 4.2           | 3.1            | 5.0           | 0.3                               | 2.5           | 2.1            | 2.6           |
|                     | PSC <sup>gm</sup>  | 0.4                                  | 3.5           | 2.7            | 4.3           | 0.4                               | 2.1           | 1.8            | 2.2           |
|                     | VGN <sup>veg</sup> | 0.2                                  | 2.3           | 1.7            | 3.6           | 0.2                               | 1.3           | 1.1            | 1.8           |
|                     | FLX                | 0.0                                  | 2.0           | 0.8            | 2.6           | 0.0                               | 1.2           | 0.6            | 1.3           |
|                     | VEG <sup>veg</sup> | 0.2                                  | 3.4           | 2.8            | 4.7           | 0.2                               | 2.0           | 1.9            | 2.4           |
|                     | VGN <sup>gm</sup>  | 0.2                                  | 3.0           | 2.5            | 4.3           | 0.2                               | 1.8           | 1.7            | 2.2           |
|                     | VEG <sup>gm</sup>  | 0.2                                  | 2.6           | 2.1            | 3.9           | 0.1                               | 1.5           | 1.4            | 2.0           |



**SI Figure 5.** Food-related GHG emissions by scenario, food group, and year.

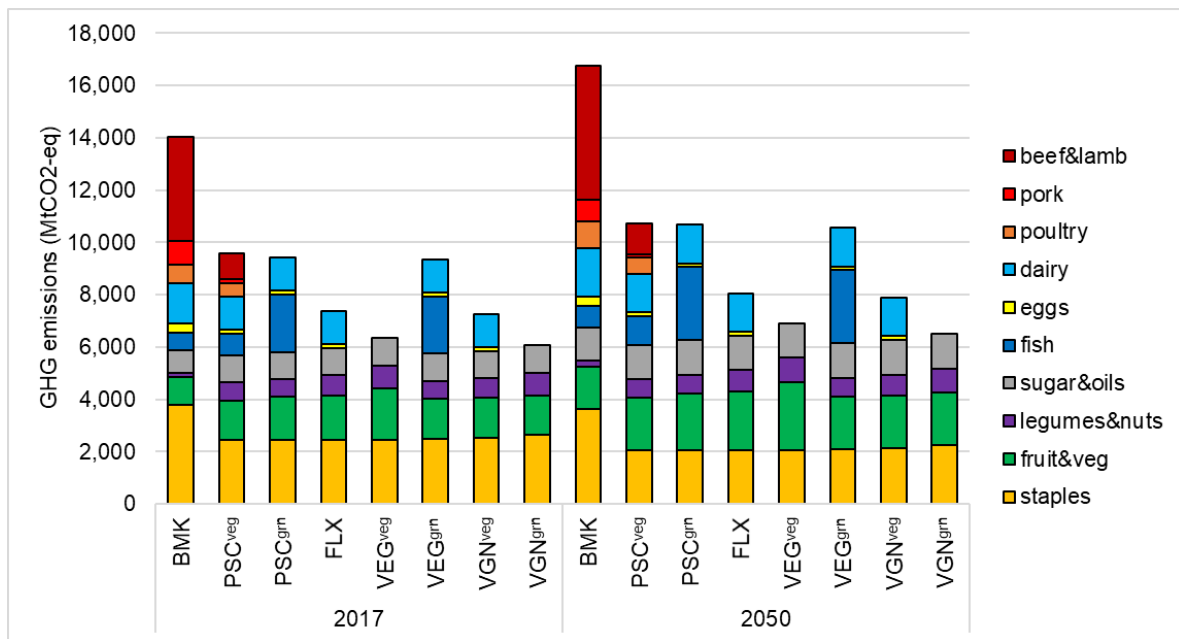

**SI Table 16.** Social cost of climate change mitigation by world region, scenario, year and socio-economic pathway.

| Region              | Scenario           | Total costs (US\$ billion per year) |               |                |               | Costs per person (US\$ per year) |               |                |               |
|---------------------|--------------------|-------------------------------------|---------------|----------------|---------------|----------------------------------|---------------|----------------|---------------|
|                     |                    | 2017<br>(bmk)                       | 2050<br>(med) | 2050<br>(high) | 2050<br>(low) | 2017<br>(bmk)                    | 2050<br>(med) | 2050<br>(high) | 2050<br>(low) |
| Global              | BMK                | 1,819                               | 9,295         | 9,140          | 9,106         | 255                              | 1,091         | 1,149          | 985           |
|                     | PSC <sup>veg</sup> | 1,218                               | 5,836         | 5,620          | 6,192         | 171                              | 685           | 706            | 670           |
|                     | PSC <sup>grn</sup> | 1,201                               | 5,798         | 5,594          | 6,133         | 168                              | 680           | 703            | 663           |
|                     | FLX                | 939                                 | 4,373         | 4,210          | 4,662         | 132                              | 513           | 529            | 504           |
|                     | VGN <sup>veg</sup> | 807                                 | 3,757         | 3,626          | 4,027         | 113                              | 441           | 456            | 436           |
|                     | VEG <sup>veg</sup> | 1,191                               | 5,735         | 5,530          | 6,069         | 167                              | 673           | 695            | 656           |
|                     | VEG <sup>grn</sup> | 925                                 | 4,283         | 4,122          | 4,570         | 130                              | 503           | 518            | 494           |
|                     | VGN <sup>grn</sup> | 773                                 | 3,530         | 3,403          | 3,797         | 108                              | 414           | 428            | 411           |
| High-income         | BMK                | 336                                 | 1,467         | 1,422          | 1,244         | 309                              | 1,186         | 1,118          | 1,182         |
|                     | PSC <sup>veg</sup> | 183                                 | 790           | 821            | 671           | 168                              | 638           | 645            | 637           |
|                     | PSC <sup>grn</sup> | 179                                 | 818           | 849            | 693           | 165                              | 661           | 667            | 658           |
|                     | FLX                | 141                                 | 609           | 635            | 517           | 130                              | 493           | 499            | 491           |
|                     | VGN <sup>veg</sup> | 103                                 | 459           | 482            | 391           | 95                               | 371           | 379            | 371           |
|                     | VEG <sup>veg</sup> | 178                                 | 809           | 839            | 685           | 164                              | 654           | 660            | 650           |
|                     | VEG <sup>grn</sup> | 139                                 | 597           | 622            | 506           | 128                              | 482           | 489            | 481           |
|                     | VGN <sup>grn</sup> | 96                                  | 423           | 444            | 360           | 89                               | 342           | 349            | 342           |
| Upper middle-income | BMK                | 410                                 | 2,021         | 1,847          | 2,124         | 420                              | 1,858         | 1,812          | 1,796         |
|                     | PSC <sup>veg</sup> | 202                                 | 909           | 863            | 992           | 206                              | 836           | 846            | 839           |
|                     | PSC <sup>grn</sup> | 174                                 | 806           | 772            | 877           | 179                              | 741           | 757            | 742           |
|                     | FLX                | 146                                 | 651           | 627            | 706           | 149                              | 599           | 616            | 597           |
|                     | VGN <sup>veg</sup> | 114                                 | 510           | 495            | 552           | 117                              | 469           | 485            | 467           |
|                     | VEG <sup>veg</sup> | 172                                 | 795           | 761            | 865           | 176                              | 731           | 746            | 731           |
|                     | VGN <sup>grn</sup> | 143                                 | 636           | 613            | 690           | 146                              | 585           | 602            | 583           |
|                     | VEG <sup>grn</sup> | 106                                 | 468           | 455            | 507           | 109                              | 431           | 447            | 429           |
| Lower middle-income | BMK                | 885                                 | 4,493         | 4,471          | 4,434         | 213                              | 935           | 1,010          | 821           |
|                     | PSC <sup>veg</sup> | 684                                 | 3,238         | 3,120          | 3,495         | 165                              | 674           | 705            | 647           |
|                     | PSC <sup>grn</sup> | 713                                 | 3,366         | 3,237          | 3,635         | 172                              | 700           | 731            | 673           |
|                     | VGN <sup>veg</sup> | 532                                 | 2,414         | 2,314          | 2,631         | 128                              | 502           | 523            | 487           |
|                     | FLX                | 477                                 | 2,143         | 2,066          | 2,331         | 115                              | 446           | 467            | 432           |
|                     | VEG <sup>veg</sup> | 708                                 | 3,333         | 3,202          | 3,600         | 171                              | 693           | 723            | 667           |
|                     | VGN <sup>grn</sup> | 525                                 | 2,365         | 2,265          | 2,580         | 127                              | 492           | 512            | 478           |
|                     | VEG <sup>grn</sup> | 460                                 | 2,022         | 1,948          | 2,206         | 111                              | 421           | 440            | 409           |
| Low-income          | BMK                | 184                                 | 1,250         | 1,335          | 1,244         | 204                              | 933           | 1,116          | 802           |
|                     | PSC <sup>veg</sup> | 147                                 | 863           | 782            | 992           | 163                              | 644           | 653            | 640           |
|                     | PSC <sup>grn</sup> | 131                                 | 778           | 708            | 895           | 145                              | 581           | 592            | 577           |
|                     | VGN <sup>veg</sup> | 118                                 | 671           | 607            | 776           | 130                              | 501           | 507            | 501           |
|                     | FLX                | 111                                 | 625           | 564            | 729           | 123                              | 467           | 471            | 470           |
|                     | VEG <sup>veg</sup> | 130                                 | 770           | 700            | 886           | 144                              | 575           | 585            | 571           |
|                     | VGN <sup>grn</sup> | 116                                 | 658           | 595            | 763           | 129                              | 491           | 497            | 492           |
|                     | VEG <sup>grn</sup> | 108                                 | 599           | 538            | 701           | 120                              | 447           | 450            | 452           |

**SI Table 17.** Positive and negative changes in cost summed over all countries.

| Diet and food-system changes                                                                 | Number of countries with cost reductions | Percent of countries with cost reductions | Population of countries with cost reductions | Number of countries with cost increases | Percent of countries with cost increases | Population of countries with cost increases |
|----------------------------------------------------------------------------------------------|------------------------------------------|-------------------------------------------|----------------------------------------------|-----------------------------------------|------------------------------------------|---------------------------------------------|
| <i>In 2017:</i>                                                                              |                                          |                                           |                                              |                                         |                                          |                                             |
| PSC <sup>veg</sup>                                                                           | 24                                       | 16%                                       | 2,638,500                                    | 126                                     | 84%                                      | 4,496,720                                   |
| PSC <sup>grn</sup>                                                                           | 33                                       | 22%                                       | 2,814,590                                    | 117                                     | 78%                                      | 4,320,620                                   |
| FLX                                                                                          | 54                                       | 36%                                       | 3,233,660                                    | 96                                      | 64%                                      | 3,901,560                                   |
| VGN <sup>veg</sup>                                                                           | 61                                       | 41%                                       | 3,439,260                                    | 89                                      | 59%                                      | 3,695,950                                   |
| VEG <sup>veg</sup>                                                                           | 72                                       | 48%                                       | 3,611,140                                    | 78                                      | 52%                                      | 3,524,070                                   |
| VEG <sup>grn</sup>                                                                           | 81                                       | 54%                                       | 3,857,560                                    | 69                                      | 46%                                      | 3,277,660                                   |
| VGN <sup>grn</sup>                                                                           | 81                                       | 54%                                       | 3,804,250                                    | 69                                      | 46%                                      | 3,330,960                                   |
| <i>in 2017, with halving of waste:</i>                                                       |                                          |                                           |                                              |                                         |                                          |                                             |
| PSC <sup>veg</sup>                                                                           | 61                                       | 41%                                       | 3,446,590                                    | 89                                      | 59%                                      | 3,688,620                                   |
| PSC <sup>grn</sup>                                                                           | 67                                       | 45%                                       | 3,541,020                                    | 83                                      | 55%                                      | 3,594,200                                   |
| VGN <sup>veg</sup>                                                                           | 78                                       | 52%                                       | 3,779,100                                    | 72                                      | 48%                                      | 3,356,110                                   |
| FLX                                                                                          | 78                                       | 52%                                       | 3,827,430                                    | 72                                      | 48%                                      | 3,307,780                                   |
| VEG <sup>veg</sup>                                                                           | 89                                       | 59%                                       | 3,987,390                                    | 61                                      | 41%                                      | 3,147,820                                   |
| VEG <sup>grn</sup>                                                                           | 101                                      | 67%                                       | 4,117,330                                    | 49                                      | 33%                                      | 3,017,880                                   |
| VGN <sup>grn</sup>                                                                           | 97                                       | 65%                                       | 4,073,820                                    | 53                                      | 35%                                      | 3,061,390                                   |
| <i>in 2030, with halving of waste, and positive development:</i>                             |                                          |                                           |                                              |                                         |                                          |                                             |
| PSC <sup>veg</sup>                                                                           | 69                                       | 46%                                       | 3,622,370                                    | 81                                      | 54%                                      | 3,924,760                                   |
| PSC <sup>grn</sup>                                                                           | 79                                       | 53%                                       | 5,190,130                                    | 71                                      | 47%                                      | 2,357,000                                   |
| VGN <sup>veg</sup>                                                                           | 90                                       | 60%                                       | 4,023,110                                    | 60                                      | 40%                                      | 3,524,020                                   |
| FLX                                                                                          | 98                                       | 65%                                       | 5,662,940                                    | 52                                      | 35%                                      | 1,884,190                                   |
| VEG <sup>veg</sup>                                                                           | 109                                      | 73%                                       | 6,232,090                                    | 41                                      | 27%                                      | 1,315,040                                   |
| VEG <sup>grn</sup>                                                                           | 118                                      | 79%                                       | 6,614,470                                    | 32                                      | 21%                                      | 932,660                                     |
| VGN <sup>grn</sup>                                                                           | 116                                      | 77%                                       | 6,602,610                                    | 34                                      | 23%                                      | 944,524                                     |
| <i>in 2030, with halving of waste, and positive development, and fuller cost accounting:</i> |                                          |                                           |                                              |                                         |                                          |                                             |
| PSC <sup>veg</sup>                                                                           | 102                                      | 68%                                       | 5,839,890                                    | 48                                      | 32%                                      | 1,707,240                                   |
| PSC <sup>grn</sup>                                                                           | 111                                      | 74%                                       | 6,229,270                                    | 39                                      | 26%                                      | 1,317,860                                   |
| VGN <sup>veg</sup>                                                                           | 115                                      | 77%                                       | 6,560,660                                    | 35                                      | 23%                                      | 986,467                                     |
| FLX                                                                                          | 116                                      | 77%                                       | 6,330,470                                    | 34                                      | 23%                                      | 1,216,660                                   |
| VEG <sup>veg</sup>                                                                           | 126                                      | 84%                                       | 6,890,380                                    | 24                                      | 16%                                      | 656,749                                     |
| VEG <sup>grn</sup>                                                                           | 129                                      | 86%                                       | 6,928,450                                    | 21                                      | 14%                                      | 618,676                                     |
| VGN <sup>grn</sup>                                                                           | 129                                      | 86%                                       | 6,873,750                                    | 21                                      | 14%                                      | 673,379                                     |
| <i>in 2050, with halving of waste, and positive development, and fuller cost accounting:</i> |                                          |                                           |                                              |                                         |                                          |                                             |
| PSC <sup>veg</sup>                                                                           | 134                                      | 89%                                       | 7,606,260                                    | 16                                      | 11%                                      | 348,961                                     |
| PSC <sup>grn</sup>                                                                           | 136                                      | 91%                                       | 7,608,830                                    | 14                                      | 9%                                       | 346,390                                     |
| VGN <sup>veg</sup>                                                                           | 140                                      | 93%                                       | 7,667,550                                    | 10                                      | 7%                                       | 287,662                                     |
| FLX                                                                                          | 142                                      | 95%                                       | 7,706,460                                    | 8                                       | 5%                                       | 248,757                                     |
| VEG <sup>veg</sup>                                                                           | 144                                      | 96%                                       | 7,775,490                                    | 6                                       | 4%                                       | 179,729                                     |
| VEG <sup>grn</sup>                                                                           | 145                                      | 97%                                       | 7,786,370                                    | 5                                       | 3%                                       | 168,847                                     |
| VGN <sup>grn</sup>                                                                           | 144                                      | 96%                                       | 7,775,490                                    | 6                                       | 4%                                       | 179,729                                     |

**SI Figure 6.** Diet costs for baseline diets (BMK), high-income Western diets (HIC), and flexitarian diets (FLX) in 2017 (top), 2030 (middle), and 2050 (low) by cost component and region. The cost components include the market prices, health-related costs, and climate-change costs. The high-income diet is defined in SI Table 4, and the others in SI Table 7.

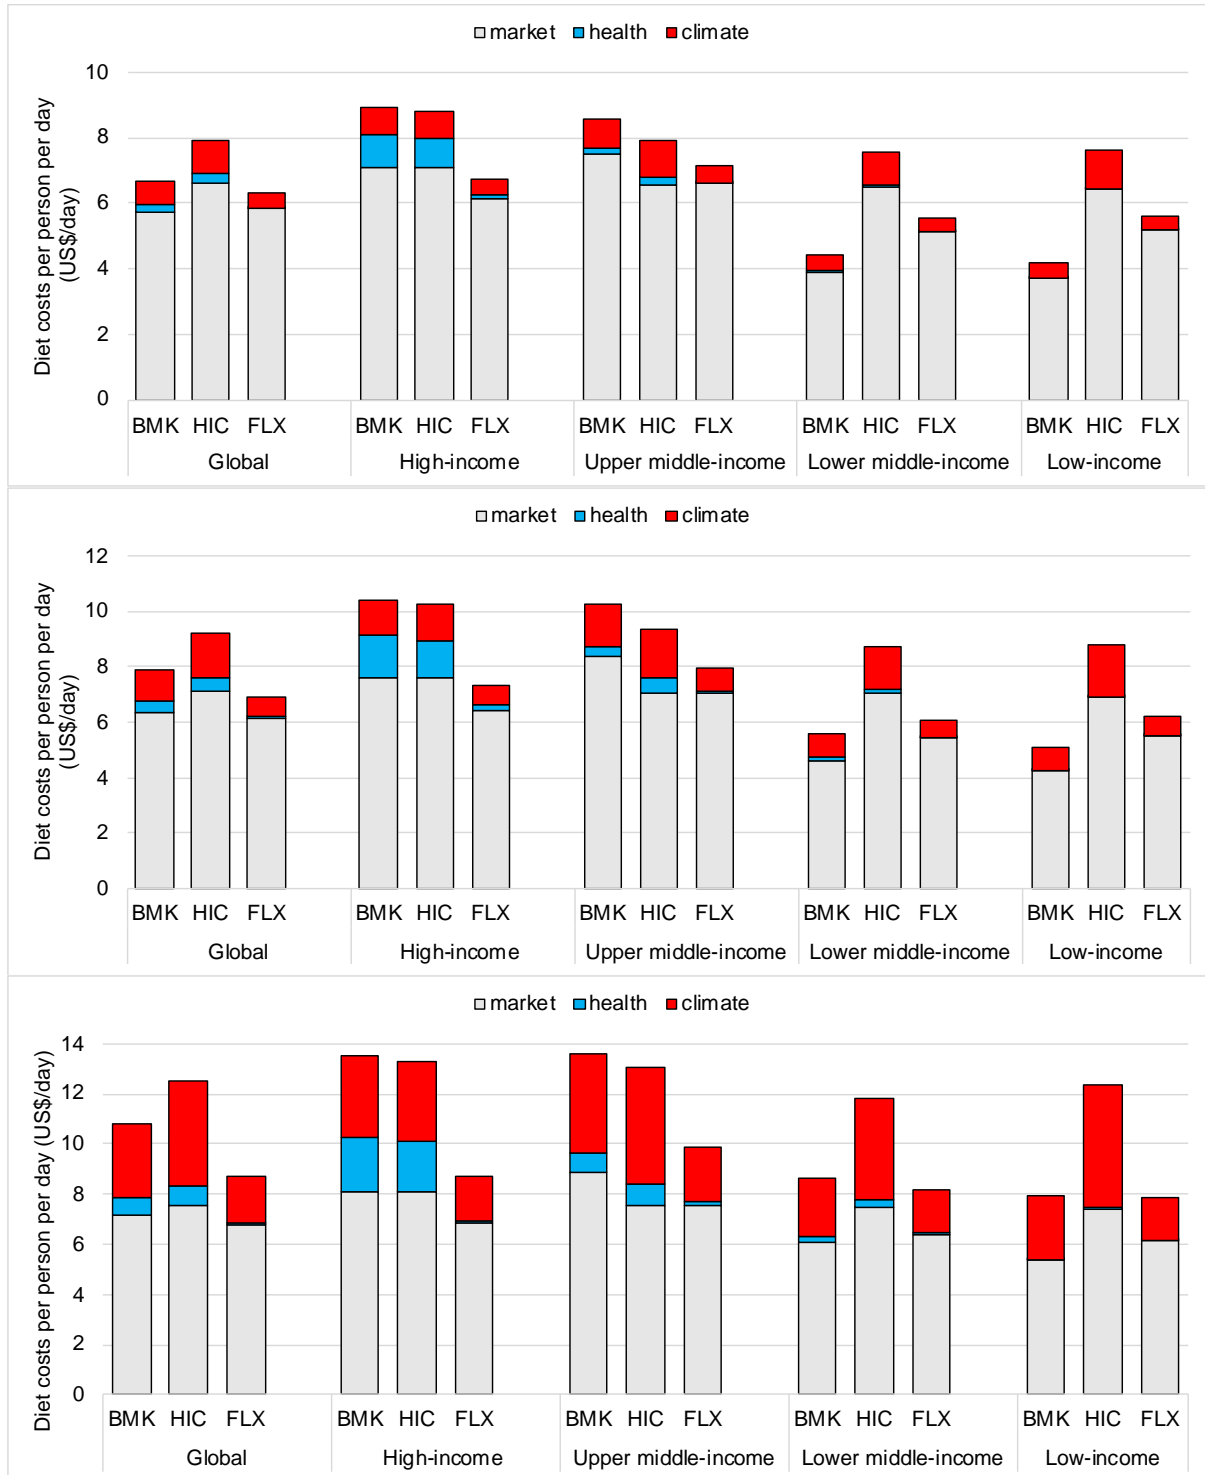

## References

- 1 Gustavsson J, Cederberg C, Sonesson U, Van Otterdijk R, Meybeck A. Global food losses and food waste: extent, causes and prevention. FAO Rome, 2011.
- 2 Food and Agriculture Organization of the United Nations. Food balance sheets: a handbook. Rome, 2001.
- 3 NCD Risk Factor Collaboration (NCD-RisC). Trends in adult body-mass index in 200 countries from 1975 to 2014: a pooled analysis of 1698 population-based measurement studies with 19.2 million participants. *Lancet* 2016; **387**: 1377–96.
- 4 Willett W, Rockström J, Loken B, *et al.* Food in the Anthropocene: the EAT-Lancet Commission on healthy diets from sustainable food systems. *Lancet (London, England)* 2019; **393**: 447–92.
- 5 Springmann M, Wiebe K, Mason-D’Croz D, Sulser TB, Rayner M, Scarborough P. Health and nutritional aspects of sustainable diet strategies and their relationship to environmental impacts – a comparative global modelling analysis with country-level detail. *Lancet Planet Heal* 2018; **2**: e451–61.
- 6 World Health Organization. Human energy requirements: Report of a Joint FAO/WHO/UNU Expert Consultation, Rome, Italy, 17-24 October 2001. Geneva, Switzerland: WHO, 2004.
- 7 Health USD of, Services H. Dietary guidelines for Americans 2015-2020. Skyhorse Publishing Inc., 2017.
- 8 Haddad EH, Tanzman JS. What do vegetarians in the United States eat? *Am J Clin Nutr* 2003; **78**: 626S-632S.
- 9 Bradbury KE, Tong TYN, Key TJ. Dietary Intake of High-Protein Foods and Other Major Foods in Meat-Eaters, Poultry-Eaters, Fish-Eaters, Vegetarians, and Vegans in UK Biobank. *Nutrients* 2017; **9**. DOI:10.3390/nu9121317.
- 10 Robinson S, Mason-D’Croz D, Islam S, *et al.* The International Model for Policy Analysis of Agricultural Commodities and Trade (IMPACT) -- Model description for version 3. 2015.

- 11 O'Neill BC, Carter T, Ebi KL, *et al.* Meeting Report of the Workshop on The Nature and Use of New Socioeconomic Pathways for Climate Change Research. 2012; published online Jan 17.
- 12 KC S, Lutz W. The human core of the shared socioeconomic pathways: Population scenarios by age, sex, and level of education for all countries to 2100. *Glob Environ Chang* 2014.
- 13 Chateau J, Dellink R, Lanzi E, Magne B. Long-term economic growth and environmental pressure: reference scenarios for future global projections. OECD. 2012.
- 14 Mason-D'Croz D, Bogard JR, Sulser TB, *et al.* Gaps between fruit and vegetable production, demand, and recommended consumption at global and national levels: an integrated modelling study. *Lancet Planet Heal* 2019; **3**: e318–29.
- 15 Stehfest E, van Zeist WJ, Valin H, *et al.* Key determinants of global land-use projections. *Nat Commun* 2019; **10**. DOI:10.1038/s41467-019-09945-w.
- 16 Murray CJL, Ezzati M, Lopez AD, Rodgers A, Vander Hoorn S. Comparative quantification of health risks: conceptual framework and methodological issues. *Popul Health Metr* 2003; **1**: 1.
- 17 Lim SS, Vos T, Flaxman AD, *et al.* A comparative risk assessment of burden of disease and injury attributable to 67 risk factors and risk factor clusters in 21 regions, 1990–2010: a systematic analysis for the Global Burden of Disease Study 2010. *Lancet* 2012; **380**: 2224–60.
- 18 Forouzanfar MH, Alexander L, Anderson HR, *et al.* Global, regional, and national comparative risk assessment of 79 behavioural, environmental and occupational, and metabolic risks or clusters of risks in 188 countries, 1990–2013: a systematic analysis for the Global Burden of Disease Study 2013. *Lancet* 2015; **386**: 2287–323.
- 19 Murray CJL, Ezzati M, Flaxman AD, *et al.* GBD 2010: design, definitions, and metrics. *Lancet* 2012; **380**: 2063–6.
- 20 Lozano R, Naghavi M, Foreman K, *et al.* Global and regional mortality from 235 causes of death for 20 age groups in 1990 and 2010: a systematic analysis for the Global Burden of Disease Study 2010. *Lancet* 2012; **380**: 2095–128.

- 21 Foreman KJ, Marquez N, Dolgert A, *et al.* Forecasting life expectancy, years of life lost, and all-cause and cause-specific mortality for 250 causes of death: reference and alternative scenarios for 2016–40 for 195 countries and territories. *Lancet* 2018; **392**: 2052–90.
- 22 Afshin A, Micha R, Khatibzadeh S, Mozaffarian D. Consumption of nuts and legumes and risk of incident ischemic heart disease, stroke, and diabetes: a systematic review and meta-analysis. *Am J Clin Nutr* 2014; : ajcn.076901.
- 23 Aune D, Keum N, Giovannucci E, *et al.* Nut consumption and risk of cardiovascular disease, total cancer, all-cause and cause-specific mortality: a systematic review and dose-response meta-analysis of prospective studies. *BMC Med* 2016; **14**: 207.
- 24 Aune D, Giovannucci E, Boffetta P, *et al.* Fruit and vegetable intake and the risk of cardiovascular disease, total cancer and all-cause mortality—a systematic review and dose-response meta-analysis of prospective studies. *Int J Epidemiol* 2016; published online March 18.
- 25 Bechthold A, Boeing H, Schwedhelm C, *et al.* Food groups and risk of coronary heart disease, stroke and heart failure: A systematic review and dose-response meta-analysis of prospective studies. *Crit Rev Food Sci Nutr* 2019; **59**: 1071–90.
- 26 Schwingshackl L, Hoffmann G, Lampousi AM, *et al.* Food groups and risk of type 2 diabetes mellitus: a systematic review and meta-analysis of prospective studies. *Eur J Epidemiol* 2017; **32**: 363–75.
- 27 Schwingshackl L, Schwedhelm C, Hoffmann G, *et al.* Food groups and risk of colorectal cancer. *Int J Cancer* 2018; **142**: 1748–58.
- 28 Zheng J, Huang T, Yu Y, Hu X, Yang B, Li D. Fish consumption and CHD mortality: an updated meta-analysis of seventeen cohort studies. *Public Health Nutr* 2012; **15**: 725–37.
- 29 Global BMI Mortality Collaboration E Di, Di Angelantonio E, Bhupathiraju S, *et al.* Body-mass index and all-cause mortality: individual-participant-data meta-analysis of 239 prospective studies in four continents. *Lancet (London, England)* 2016; **388**: 776–86.
- 30 Aune D, Keum N, Giovannucci E, *et al.* Whole grain consumption and risk of

- cardiovascular disease, cancer, and all cause and cause specific mortality: systematic review and dose-response meta-analysis of prospective studies. *BMJ* 2016; **353**: i2716.
- 31 Singh GM, Danaei G, Farzadfar F, *et al.* The Age-Specific Quantitative Effects of Metabolic Risk Factors on Cardiovascular Diseases and Diabetes: A Pooled Analysis. *PLoS One* 2013; **8**: e65174.
- 32 Micha R, Shulkin ML, Peñalvo JL, *et al.* Etiologic effects and optimal intakes of foods and nutrients for risk of cardiovascular diseases and diabetes: Systematic reviews and meta-analyses from the Nutrition and Chronic Diseases Expert Group (NutriCoDE). *PLoS One* 2017; **12**: e0175149.
- 33 Springmann M, Spajic L, Clark MA, *et al.* The healthiness and sustainability of national and global food based dietary guidelines: modelling study. *BMJ* 2020; **370**: m2322.
- 34 GBD 2017 Diet Collaborators, Afshin A, Sur PJ, Fay KA, *et al.* Health effects of dietary risks in 195 countries, 1990-2017: a systematic analysis for the Global Burden of Disease Study 2017. *Lancet (London, England)* 2019; **0**. DOI:10.1016/S0140-6736(19)30041-8.
- 35 Schwingshackl L, Knüppel S, Schwedhelm C, *et al.* Perspective: NutriGrade: A Scoring System to Assess and Judge the Meta-Evidence of Randomized Controlled Trials and Cohort Studies in Nutrition Research. *Adv Nutr An Int Rev J* 2016; **7**: 994–1004.
- 36 World Cancer Research Fund/American Institute for Cancer Research. Diet, Nutrition, Physical Activity and Cancer: A Global Perspective. Continuous Update Project Expert Report. 2018.
- 37 Aune D, Norat T, Romundstad P, Vatten LJ. Dairy products and the risk of type 2 diabetes: a systematic review and dose-response meta-analysis of cohort studies. *Am J Clin Nutr* 2013; **98**: 1066–83.
- 38 Aune D, Lau R, Chan DSM, *et al.* Dairy products and colorectal cancer risk: a systematic review and meta-analysis of cohort studies. *Ann Oncol Off J Eur Soc Med Oncol* 2012; **23**: 37–45.
- 39 Leal J, Luengo-Fernández R, Gray A, Petersen S, Rayner M. Economic burden of



- cardiovascular diseases in the enlarged European Union. *Eur Heart J* 2006; **27**: 1610–9.
- 40 Springmann M, Godfray HCJ, Rayner M, Scarborough P. Analysis and valuation of the health and climate change cobenefits of dietary change. *Proc Natl Acad Sci* 2016; **113**: 4146–51.
- 41 Nichols M, Townsend N, Scarborough P, Rayner M. European cardiovascular disease statistics. 2012.
- 42 Luengo-Fernandez R, Leal J, Gray A, Sullivan R. Economic burden of cancer across the European Union: a population-based cost analysis. *Lancet Oncol* 2013; **14**: 1165–74.
- 43 Zhang P, Zhang X, Brown J, *et al.* Global healthcare expenditure on diabetes for 2010 and 2030. *Diabetes Res Clin Pract* 2010; **87**: 293–301.
- 44 American Diabetes Association. Economic costs of diabetes in the US in 2012. *Diabetes Care* 2013; **36**: 1033–46.
- 45 Köster I, Huppertz E, Hauner H, Schubert I. Direct costs of diabetes mellitus in Germany-CoDiM 2000-2007. *Exp Clin Endocrinol diabetes Off journal, Ger Soc Endocrinol [and] Ger Diabetes Assoc* 2011; **119**: 377–85.
- 46 Poore J, Nemecek T. Reducing food’s environmental impacts through producers and consumers. *Science* 2018; **360**: 987–92.
- 47 Beach RH, Creason J, Ohrel SB, *et al.* Global mitigation potential and costs of reducing agricultural non-CO2 greenhouse gas emissions through 2030. *J Integr Environ Sci* 2015; **12**: 87–105.
- 48 Springmann M, Clark M, Mason-D’Croz D, *et al.* Options for keeping the food system within environmental limits. *Nature* 2018; **562**: 519–25.
- 49 Nordhaus WD. Revisiting the social cost of carbon. *Proc Natl Acad Sci U S A* 2017; **114**: 1518–23.
