# Supplementary material for: The global and regional costs of healthy and sustainable dietary patterns: a modelling study
Source: PubMed Central journal article supplement (PMC8581186; doi:10.1016/s2542-5196(21)00251-5), 2021-10-27
Supplement: mmc2.pdf [file mmc2.pdf]

# THE LANCET Oncology

## Supplementary appendix 2

This appendix formed part of the original submission and has been peer reviewed.  
We post it as supplied by the authors.

Supplement to: Springmann M, Clark MA, Rayner M, Scarborough P, Webb P.  
The global and regional costs of healthy and sustainable dietary patterns: a modelling  
study. *Lancet Oncol* 2021; published online Oct 26. [http://dx.doi.org/10.1016/  
S2542-5196\(21\)00251-5](http://dx.doi.org/10.1016/S2542-5196(21)00251-5).
